# Supplementary material
Source: Research Square preprint supplement (doi:10.21203/rs.3.rs-9871864/v1)
Supplement: Supplementary file 1 [file 21748042c94823e994b6daee.xlsx]

## Sheet: harmonized_data
project_title	project_description	programming_language	Start Date	LLM or not	Drug discovery phase	maturity_rating	customer_size	summary	additional_info		language	deployment_type	success_for_devs	success_for_business	proper_dev_support	proper_bus_support	other_applications_of_technology	bo_do_again	build_vs_buy_recommendation	programming_language	deployment_location	deployment_details	project_level	project_phase	project_team_and_ftes	algorithms_used	endpoint_reached_percentage	data_source_category	data_source_description	success_criteria_category	success_criteria_additional_info	algorithm_workflows	algorithm_library_version	algorithm_evaluation	algorithm_next_time	standardized_nlp_type	standardized_nlp_subtype	expected_endpoint	higher_business_goals	success_achieved	data_next_time	data_learning	data_evaluation	data_preparation	data_issues	data_description	maturity_rating	customer_size	training_set_source
Automated Batch Record Review by Exception to Minimize Human Interaction and Enhance Efficiency in XXXXXXXXXX's Manufacturing Processes	The project "Automated Batch Record Review" at XXXXXXXXXXX is currently in the planning stage and has not yet started. The project aims to automate the batch record review process, which is currently performed by humans, with the goal of reducing human interaction needed to release products. The expected endpoint is a batch record review by exception performed by an engine. The project has not ac…		Unknown	0	Manufacturing	1	Unknown	Project in early planning, facing data access issues, lacks developer and business support, minimal progress, needs better stakeholder alignment and algorithm integration.	%% Efficient Processes/Robust Processes - All XXXXX Population working on Batch Record Review, multiple 10k in all manufacturing sites - Project Level: In planning - Project Phase: Not started - Expected Endpoint: Batch record review by exception performed by an engine instead of humans - Success Criteria: How much human interaction is still needed to release product - Success Achieved: No - High…		['German']		No	No	No	No	No	No	unknown				In planning	Not Started	Other - 0	[]	10	Unknown	Mes/Dcs/Fs/Sop	other	how much human interaction is still needed to release product.	Unknown	Unknown	Unknown	Unknown	[]	[]	Batch Record Review	Other	No	Unknown	Unknown	Unknown	Unknown	Data Access	Manufacturing and Development Data	1	Unknown	Unknown
Developing an NLP-Based Algorithm for Efficient Classification of Peer-Reviewed Publications: A Proof of Concept by XXXXXXXX Utilizing NER and Advanced NLP Techniques to Expedite Systematic Literature Reviews	The project "KiaKia" by XXXXXXXXX is a Proof of Concept (PoC) currently in progress, aimed at developing an algorithm to classify titles and abstracts of peer-reviewed publications with exclusion reasons and minimal training data. The project utilizes Named Entity Recognition (NER) and other NLP use cases, employing algorithms such as SpaCy, SciBite, LLMs, Linguamatics, and ELMO. The primary data…		2020	1	Research	5	1000	Key insights: - NLP-based algorithm for classifying peer-reviewed publications. - Algorithms: SpaCy, SciBite, LLMs, Linguamatics, ELMO. - Data issues: duplicates, empty abstracts, incorrect labels. - Challenges: data quality, training data imbalance, algorithm performance. - Future steps: data cleaning, synthetic data generation, generative models.	- Project Overview: - NLP Type: Named Entity Recognition - NLP Subtype: NLP use cases embedded in KiaKia - Project Level: Proof of Concept (PoC) - Project Phase: In progress - Expected Endpoint: Algorithm that classifies titles and abstracts of peer-reviewed publications with exclusion reasons and minimal training data - Success Criteria: Reduced conflicts with human classifications and reduced e…		['English']		Unknown	Unknown	Yes	Yes	Unknown	Yes	build			Other: the solution is not decided yet	PoC	In Progress	Other - 3	['Linguamatics', 'LLM', 'Elmo', 'SciBite', 'SpaCy']	50	Public	Public Data From Electronic Databases E.G. Embase, Pubmed, Cochrane Library Etc	other	reduced conflicts with human classifications and reduced effort required by human to complete slrs	TERMite	Other	Manual Evaluation, Automated Evaluation	LLM, Generative Models	['NER', 'Relationship Extraction', 'Entity Recognition']	['NLP Use Cases', 'Kia']	Classification Algorithm	SLR Delivery	No	Data Cleaning, Synthetic Data Generation, Generative AI, Library Normalization	Training Set Issues, Misclassified Records, Prospective Setting	Human Evaluation, Partial Automated Evaluation	Other	Duplicate Records, Empty Abstracts, Human Labeling Issues, Character Set Issues	PubMed, Peer Reviewed Medical Literature, EMBASE	5	1000	Other
Development and Deployment of an Interactive Text Mining Suite (ITMS) for Self-Service Exploratory Analysis of Unstructured Data Using NLP Techniques at XXXXXXXX	The Interactive Text Mining Suite (ITMS) project, developed by XXXXXXXXX is a completed production-level initiative deployed as a web server on-premise. The project aimed to create a self-service, intuitive tool for exploratory text mining, focusing on unstructured data such as survey comments and log files. The suite employs various NLP techniques, including frequency analysis, sentiment analysi…		2021	0	GS&A	8	10	Developed a self-service text mining tool for unstructured data. Used Shiny, R, Wordcloud, Quanteda, TM, Topicmodels, NbClust. Achieved success despite data issues and lack of support. Enhanced self-service capabilities. High tool usage and efficiency with a small team. Recommend building in-house, ensuring support, and addressing data issues early.	- Project Overview: - NLP Types: Frequency Analysis, Sentiment Analysis, Clustering, Topic Modeling - NLP Subtypes: Unstructured data, no limitations regarding content - Project Level: Production - Project Phase: Completed - Expected Endpoint: No code, intuitive, self-service tool for exploratory text mining - Success Criteria: Tool usage - Success Achieved: Yes - Higher Business Goals: Enhancing…		['English']	web server on premise	Yes	Yes	No	No	No	Yes	build		On Premise		Production	Completed	Other - 1	['Shiny', 'R']		Unknown	Unstructured Data Collected By Functions E.G. Survey Comments, Log Files, Etc.	usage metrics	tool usage	Interactive User Interface	WordCloud, Quanteda, TM, TopicModels, NbClust	SME Evaluation	Unknown	['Frequency Analysis', 'Sentiment Analysis', 'Clustering', 'Relationship Extraction']	['Relationship Extraction']	Other	Self-Service Capabilities	Yes	Unknown	Character Set Issues	Human Evaluation	Stopword Removal, Stemming, Lemmatization, Cleansing	Unknown	Log Files, Survey Comments	8	10	Unknown
Efficient Extraction of SEND-Compliant Findings from Preclinical Toxicology Reports Using BioBERT and Custom NLP Pipelines for Predictive Safety Modeling and Translational Research	The project titled "Preclinical Toxicology Report Mining with HAWK" was conducted by ХХХХХХХХХ. It involved mining internal toxicology reports using a cloud-based web server deployment. The project, which ran from July 2020 to July 2021, aimed to generate SEND-compliant outputs of major findings from approximately 1000 toxicology reports to aid predictive safety modeling. The success criteria foc…		2020	0	Late-stage safety monitoring	9	20	BioBERT and custom NLP pipelines achieved significant time savings in extracting SEND-compliant findings, ensuring high data quality and cost-effectiveness.	- Project Overview: - NLP Type: Named Entity Recognition; Relationship Extraction - NLP Subtype: Compound/drug names, treatment groups/doses, test article related adverse events - Project Level: Production - Project Phase: Completed - Start-End Dates: 07/2020 - 07/2021 - Objectives and Outcomes: - Expected Endpoint: SEND-compliant output of test article related major findings from around 1000 Tox…		['English']	web server cloud-based	Yes	Yes	Yes	Yes	Yes	Yes	build		Cloud	-based	Production	Completed	Other - 2	['BioBERT']		Private	Internal Toxicology Reports	time saving	time saving in annotation and send-compliant test article related major findings extraction	Custom Pipeline	Other	Manual Evaluation	No Change	['NER', 'Relationship Extraction', 'Relationship Extraction', 'Entity Recognition']	['Relationship Extraction']	SEND-Compliant Output	Structured Output	Yes	Unknown	Data Quality, Spot Check	Human Evaluation	Abbyy Conversion	Unknown	Internal Toxicology Reports	9	20	Semi-Supervised
Leveraging Social Media Analytics for Decision Support in pRED Drug Projects through Advanced NLP Techniques in the MedMon Web Application by XXXXXXXXX	The MedMon project by ХХХХХХХХХ, is a multilingual web server application hosted by a vendor, currently in production and in progress. The project aims to support decision-making in XXXXXX drug projects through social media analytics, leveraging public data sources like Twitter and blogs. The primary goal is to extract and analyze patient information using Named Entity Recognition (NER), Informat…		2018	0	Social media listening	9	10	Key insights: Successful decision support in XXX drug projects using social media analytics. High maturity, effective vendor-developed algorithms, and future improvements planned.			['Multilingual']	web server hosted by vendor	Yes	Yes	Yes	Yes	Yes	Yes	buy		Web Server	hosted by vendor	Production	In Progress	Other - 0.1	['R']	90	Public	Social Media Open Sources (E.G. Twitter, Blogs)	usage metrics	number of pred drug projects supported	Vendor Developed	Other	Test/Train Set	Modern Algorithms	['NER', 'Information Extraction', 'Relationship Extraction']	[]	Web Application	Decision Support	Yes	External Data Providers, Data Quality Improvement, Cost Consideration	End-User Evaluation	End-User Evaluation	Character-Set Errors	Web Data Quality Issues	Social Media Threads	9	10	Unknown
Leveraging IQVIA NLP for Enhanced Scientific Information Support in Drug Projects: A Web-Based On-Premise Solution by XXXXXXXX Utilizing Named Entity Recognition and Information Extraction Techniques	The project, led by ХХХХХХХХ and titled "IQVIA NLP (Linguamatics I2E)," is managed by ХХХХХХХХ and involves the deployment of a web application on-premise. The project, which is currently in progress at the production level, aims to support scientific information needs for drug projects by leveraging NLP techniques such as Named Entity Recognition, Information Extraction, Relationship Extraction,…		2007	0	Research	10	15	NLP techniques supported drug projects. Data issues included deduplication and XML variations. IQVIA NLP was flexible but less accurate than Termite. Future steps involve creating a data lake.	- Project Overview: - NLP Type: Named Entity Recognition; Information Extraction; Search; Rule-based retrieval - NLP Subtype: Multiple (e.g., genes, diseases, cell types, mutations, etc.) - Project Level: Production - Project Phase: In progress - Expected Endpoint: Support to answer complex scientific questions - Success Criteria: Number of drug projects supported - Success Achieved: Yes - Higher…		['English']	web app on prem	Yes	Yes	Unknown	Yes	Yes	Yes	buy		On Premise	web app	Production	In Progress	Other - 0.25	['R']		Private	Internal Documents And Public Data	usage metrics	number of drug projects supported	Internal Workflows	Unknown	Other	Potential Alternative	['NER', 'Information Extraction', 'Relationship Extraction', 'Entity Recognition']	['Multiple', 'Genes', 'Diseases', 'Cell Types', 'Mutations']	Other	Scientific Information Support	Yes	Data Lake, Uniform Standards	Data Granularity	Use Case Results	Other	Deduplication, XML Standards Variation	Full Text Articles, Patents, Grant Databases, Competitor Information Databases	10	15	Unknown
Development of a Multilingual Cloud-Based NLP Engine for Internal XXXXXXXX Applications Using Zero/Few Shot Learning and Data Augmentation Techniques	The project, titled "NLP Engine," is spearheaded by ХХХХХХХХХХ as the point of contact. It is a multilingual, cloud-based web server deployment currently in production and in progress. The project has achieved success for both developers and business, with proper support in place. The recommendation is to build rather than buy. The project team consists of 3.5 full-time equivalents, including 1 p…		2021	0	Base	9	50	Multilingual NLP engine developed; cloud-based deployment; zero/few shot learning; data augmentation; GitLab CI/CD workflows; human evaluation; class imbalance addressed; 80% endpoint reached; high maturity rating; modular platform; best practices in code management; specialized team roles.	- NLP Platform: Includes more than 10 NLP tasks. - NLP Subtypes: - Genomics Platform dataset - Patent Descriptions - Publications & Literatures - HCP Feedback - Project Level: Production - Project Phase: In progress - Expected Endpoint: Scalable API - Success Criteria: - Number of NLP Use Cases hosted - Number of users - Number of models deployed - Success Achieved: Yes - Higher Business Goals: -…		['Multilingual']	web server cloud-based	Yes	Yes	Yes	Yes	Yes	Yes	build		Cloud	-based	Production	In Progress	Other - 3.5	['R']	80	Private	Both Public And Internal	usage metrics	number of nlp use cases hosted; number of users; number of models deployed	GitLab CI/CD	TM	Annotated Datasets	Depends on Use Case	['Relationship Extraction', 'NLP Platform']	['Relationship Extraction']	Scalable API	NLP Engine	Yes	Other	Data Augmentation	Human Evaluation	Zero/Few Shot Learning, Data Augmentation	Other	Public and Internal Data	9	50	70/30 Split, Varied Across Tasks
Developing an On-Premise Chatbot for Technical Transfer in Drug Manufacturing Using LLaMA, Vicuna, and Obj2Vec Algorithms at XXXXXXXX to Enhance Efficiency and Reduce Information Retrieval Time	The project, titled "ChatBot for Technical Transfer," is being undertaken by ХХХХХХХХ and is currently in the Proof of Concept (PoC) phase. The project aims to develop a chatbot that serves as a senior Subject Matter Expert (SME) to explain and consult on drug product manufacturing processes across the manufacturing network and product phases. The primary goal is to save time and costs associated…		2023	0	Manufacturing	2	100	Developed a chatbot to consult on drug manufacturing, using LLaMA, Vicuna, Obj2Vec. Key challenges: data quality, incomplete metrics. Future: GPT-4, better data strategy.	- Project Overview: - NLP Type: Natural Language Generation, Semantic Search - NLP Subtype: Technical manufacturing documents, deviations, health authority documents - Project Level: MVP - Project Phase: In progress - Expected Endpoint: Develop a chatbot serving as a senior SME to explain and consult on drug product manufacturing processes across the manufacturing network and product phases. - Su…		['English']	server on premise OR validated cloud environment	Unknown	Unknown	Unknown	Yes	No	Unknown	build		On Premise	server or validated environment	PoC	In Progress	Other - 4	['Vicuna', 'Obj2Vec', 'Llama']	20	Private	Internal Document Databases	other	key results: 1. identify and access relevant technical manufacturing documents bla filing; q&a from techreg; process development documentation has guidance documents (fda guidance for industry documents) 2. extract plain text from these documents and check if we are not missing important information in tables 3. iteratively fine tune a llm (biogpt?) with selected plain text from above documents	Custom Pipeline, Cloudera	Python	Not Determined	GPT-4	['Semantic Search']	[]	Chatbot	Time Saving	No	Unknown	Other	Manual Evaluation, Data Profiling, Pandas Profiling	Data Cleaning	Data Quality Issues	Technical Manufacturing Data, Health Authority Documents, Technical Regulatory Q&A, Process Development Documentation	2	100	Not Defined
Predictive Incident Categorization Using Topic Modeling on Infrastructure Ticketing Data: A Completed PoC by XXXXXXXX to Enhance Focus on Relevant Improvements and Value-Added Activities	The project titled "Incident Categorization" was conducted by ХХХХХХХХ. It involved deploying an RStudio instance on a laptop for on-premise analysis using the R programming language. The project, which was a Proof of Concept (PoC) and has been completed, aimed to predict the category of incidents from an internal validated ticketing system using topic modeling techniques. Despite achieving succe…	R	2020	0	GS&A	5	Unknown	Project aimed to predict incident categories using topic modeling. Achieved technical success but not business success. Key challenges included translation issues and data granularity. Future projects should standardize language and ensure data granularity.	- Project Overview: - Topic: Topic Modeling - NLP Type: Topic modeling - NLP Subtype: Incident IDs and description of ServiceNow records - Project Level: MVP - Project Phase: Completed - Expected Endpoint: Prediction of the category of the incident to come - Success Criteria: Manual review - Success Achieved: No - Higher Business Goals: Enable the team to focus on relevant improvements and more v…		[None]	RStudio instance on laptop	Yes	No	No	No	Yes	Unknown	build	R	On Premise	rstudio instance on	PoC	Completed	Other - 5	['R']		Private	Internal Validated Ticketing System	manual review	manual review	Unknown	WordCloud, TM, TopicModels, NbClust	Manual Evaluation, Automated Evaluation	Don't Know	[]	['Relationship Extraction']	Category Prediction	Focus on Improvements	No	Standardize Language	Data Granularity	Human Evaluation	Stemming, Stopword Removal	Translation Issues	Infrastructure Ticketing Data	5	Unknown	100/0 Split, Unsupervised, Cross-Validation
Development and Deployment of an XGBoost-Based ML Classifier for Accurate Detection of Critical Findings Using Quality Data at XXXXXXXX	The project titled "Finding Criticality Misclassification" was conducted by ХХХХХХХХХ as the point of contact. The project aimed to develop a high-performing machine learning classifier to accurately detect critical findings, leveraging quality data despite its low volume and complexity. The project, which ran from November 2021 to May 2022, was completed successfully, achieving its objectives ba…		2021	0	Manufacturing	7	50	High-quality data, despite low volume, was effectively processed using XGBoost and oversampling, achieving critical findings detection goals. Human evaluation ensured data relevance.	- Project Overview: - Type: ML Classification - Subtype: Wordclouds, Entity Recognition - Level: Pilot - Phase: Completed - Start-End Dates: 11/2021 - 05/2022 - Objectives: - Expected Endpoint: High-performing ML classifier that detects critical findings correctly - Success Criteria: ML metrics - Success Achieved: Yes - Higher Business Goals: Reduce time to detect critical findings - Data: - Desc…		['English']	Local before, plans to put into production	Yes	Yes	Yes	Yes	Yes	Yes	build		On Premise	before, plans to put into production	PoC	Completed	Other - 4	['XGBoost']		Private	Quality Data	ml metrics	ml metrics	Unknown	Other	Manual Evaluation, Test Set Evaluation	Same	['ML Classification']	['Relationship Extraction', 'Wordclouds']	ML Classifier	Critical Findings Detection	Yes	Unknown	Other	Human Evaluation	Tokenization, Preprocessing	Low Data Volume	Quality Data	7	50	70/30 Split
Automated Identification of Clinical Trial Names Using BERT-Based Named Entity Recognition for Enhanced Text Processing in Clinical Research	The project, led by ХХХХХХХХХХ, aims to identify clinical study names using Named Entity Recognition (NER) with a focus on clinical trial names. The project is currently in the planning phase and is 40% complete. The goal is to achieve reliable identification of clinical trial names, with success defined as user acceptance when over 90% of identified terms are correctly recognized. The project ha…		Unknown	0	Clinical	9	100	Reliable identification of clinical trial names achieved using BERT-based NER. Success criteria met with over 90% accuracy. High maturity rating and value to effort ratio.	- Project Overview: - Type: Named Entity Recognition (NER) - Subtype: Clinical trial names - Project Level: In preparation (collection of training data) - Project Phase: In progress - Expected Endpoint: Reliable identification of clinical trial/study names regardless of capitalization - Success Criteria: Acceptance by users when more than 90% of identified terms are correctly identified as clinic…		['Any language']	ideally central MLOps deployment	Unknown	Unknown	Unknown	Yes	Yes	Yes	build			Other: ideally central mlops deployment	In planning	In Progress	Other - 1	['R']	40	Unknown	Literature, Clinical Trial Dbs And News Data	acceptance	expected is an acceptance by users when more than 90% of the identified terms are correctly identified as clinical trial names	Other	BERT	Manual Evaluation, Automated Evaluation	BERT	['NER', 'Relationship Extraction', 'Entity Recognition']	['Clinical Trial Names']	Reliable Identification	Clinical Trial Identification	Yes	Other	Other	Other	Tokenization, Sentence Splitting	Irrelevant Homonyms	XML, JSON, TSV, TXT	9	100	Data Preparation
Fix Forever: Cloud-Based Trend Detection in Deviations Using Topic Modeling to Enhance User Engagement and Satisfaction for SMEs in Veeva Data	The project "Fix Forever" by ХХХХХХХХХ, is a cloud-based web server deployment (ECAS) focused on trend detection in deviations using topic modeling. The project is currently in the Proof of Concept (PoC) phase with a 70% endpoint reached. The team comprises 4 full-time equivalents (FTEs) including business and NLP experts, and data scientists. The primary data source is Veeva, with data issues re…		2022	0	Manufacturing	6	20	Trend detection in deviations using topic modeling is crucial for user engagement. Data quality and language translation were significant challenges. Future iterations will use semi-supervised and guided topic modeling, and German language models. The project is 70% complete, aiming for a dashboard endpoint.	- Information: Topic Modeling - Topics: Problem and Causes in Deviations - NLP Type: Topic Modeling - NLP Subtype: Topics of problem and causes in deviations - Project Level: Proof of Concept (PoC) - Project Phase: In progress - Expected Endpoint: Dashboard to provide Topics in Track and Trend deviations to SMEs - Success Criteria: User satisfaction, user engagement - Success Achieved: Not yet - …		['German']	web server cloud-based (ECAS)	Yes	Unknown	Yes	Yes	Yes	Yes	build		Cloud	-based (ecas)	PoC	In Progress	Other - 4	['NLTK', 'Pandas', 'R']	70	Private	Veeva	user satisfaction	user satisfaction, user engagement,...	SageMaker	Pandas, BERT	Automated Evaluation, Precision, Recall	BERT, UMAP, HDBSCAN	[]	[]	Dashboard	Trend Detection	No	Guided Topic Modeling	Writing Quality	Human Evaluation	Blacklist Removal, Stopword Removal, Punctuation Removal	Poor Writing Quality	Deviations	6	20	Unsupervised, 80/20 Split, Topic Modeling
Accelerating Root Cause Analysis for Open Deviations Using NLP Techniques in a Cloud-Based PoC at XXXXXXXX	The project titled ХХХХХХХХХ, aims to reduce processing time for root cause analysis and remediation of open deviations using NLP techniques such as translation and semantic similarity calculation. The project, currently paused at the Proof of Concept (PoC) level, is deployed on a cloud-based web server (ECAS) and involves a team of five full-time equivalents (FTEs). The primary data sources are …		2022	0	Manufacturing	9	100	Objective: Reduce processing time for root cause analysis using NLP. Status: Paused at PoC, 90% endpoint achieved, maturity rating 9. Success Criteria: User satisfaction and engagement not achieved. Methodologies: AWS Comprehend, NLTK, Pandas, SentenceTransformers; AWS Step Functions, SageMaker; tokenization, anonymization, blacklist removal, stop word removal, punctuation removal; evaluated by p…	- Project Overview: - Objective: Reducing processing time to find root cause and remediation for open deviations. - NLP Type: Translation, Semantic similarity calculation. - NLP Subtype: Deviations. - Project Level: MVP. - Project Phase: Paused. - Expected Endpoint: Tableau Dashboard displaying top 50 similar closed deviations to each open deviation. - Success Criteria: User satisfaction, user en…		['French', 'Portuguese', 'Chinese', '...']	web server cloud-based (ECAS)	Yes	Unknown	Yes	Yes	Yes	Unknown	build		Cloud	-based (ecas)	PoC	Paused	Other - 5	['NLTK', 'Pandas', 'R']	90	Private	Trackwise And Veeva	user satisfaction	user satisfaction, user engagement,...	AWS Step Functions, SageMaker	Hugging Face, Transformers, PyTorch, Python, AWS Wrangler, LangDetect, SageMaker, BERT	Automated Evaluation, Precision, Recall	Cosine Similarity, Same	['Semantic Similarity']	[]	Dashboard	Other	No	Unknown	Writing Quality, Translation Quality, Human Expectation	Automated Evaluation, Precision, Recall, F-Score	Tokenization, Blacklist Removal, Stopword Removal, Punctuation Removal	Translation Issues	Deviations	9	100	Unsupervised
Enhancing Quality Analytics at XXXXXXXX: A Cloud-Based NLP Approach for Deviation Data Insights Using AWS, BERTopic, and SageMaker	The "Quality Analytics" project at ХХХХХХХХХ, is a cloud-based web server deployment (ECAS) aimed at enhancing quality analytics through NLP techniques. The project, currently in the Proof of Concept (PoC) phase, involves a team of 20 full-time equivalents (FTEs) including data scientists, an NLP expert, business analysts, and a data engineer. The primary data sources are TrackWise and Veeva, foc…		2020	0	Manufacturing	8	250	Key insights: - NLP techniques enhance quality analytics. - Data preparation includes tokenization, anonymization. - Algorithms: BERTopic, AWS Comprehend, NLTK, Pandas. - Challenges: data quality, user satisfaction. - Future: extract prior knowledge, semi-supervised approaches.	- Project Overview: - NLP Types: Classification, Topic Modeling, NER, Translation - NLP Subtypes: Cause, Problem, Remediation of Deviations - Project Level: MVP - Project Phase: In Progress - Expected Endpoint: Several Dashboards to provide insights for SMEs - Success Criteria: User satisfaction, user engagement - Success Achieved: No - Higher Business Goals: Reducing the number of deviations - O…		['French', 'Portuguese', 'Chinese', '...']	web server cloud-based (ECAS)	Yes	Unknown	Yes	Yes	Yes	Unknown	build		Cloud	-based (ecas)	PoC	In Progress	Other - 20	['NLTK', 'Pandas', 'R']	80	Private	Trackwise And Veeva	user satisfaction	user satisfaction, user engagement,...	AWS Step Functions, SageMaker	AWS Wrangler, LangDetect, SageMaker, AWS Lambda Powertools	Manual Evaluation, Automated Evaluation	BERT, AWS Comprehend	[]	['Relationship Extraction']	Dashboard	Other	No	Extract Prior Knowledge, Semi-Supervised Approaches	Writing Quality, Translation Quality, Human Expectation	Automated Evaluation, Precision, Recall, F-Score, ABC Pairs, Topic Modeling	Tokenization, Blacklist Removal, Stopword Removal, Punctuation Removal	Translation Issues	Other	8	250	80/20 Split
Enhancing Patent Processing with BioBERT: A Proof of Concept for Efficient Patent Annotation and Categorization at XXXXXXXX	The project, led by ХХХХХХ and titled "Patent Annotation and Categorization," is currently in progress and aims to enhance patent processing through advanced NLP techniques. The project is managed by ХХХХХХ and involves the use of BioBERT algorithms within a custom pipeline to categorize patents by semantically matching phrases. The goal is to enable the patent department to label patents efficie…		2023	0	Research	8	18537	Utilized BioBERT for patent categorization. Key challenges: lack of large training set. High value-to-effort ratio. Future: consider PatentBERT, RoBERTa.	- Project Overview: - NLP Type: Few-shot learning based categorization on marked phrases - NLP Subtype: ML categorization by semantically matching phrases (e.g., phase I trial, first entry in human, initial clinical study) - Project Level: MVP - Project Phase: In progress - Expected Endpoint: Enable colleagues in the patent department to label patents with categories by showing phrases that defin…		['English']	MLOPs (in prep)	Unknown	Unknown	Unknown	Unknown	Yes	Unknown	build			Other: mlops (in prep)	PoC	In Progress	Other - 0	['BioBERT']	20	Public	Public Patents, Via Licensed Platform, Stable Export Xml Format	other	ideally the implementation reaches the level of our pilot (+/- 85%). the pilot was successfully completed in 2018 with kairntech, paused because of budget constrains.	Custom Pipeline	BioBERT	Manual Evaluation, Automated Evaluation	Piloted with BioBERT, Consider Alternatives, BERT	['Few Shot Learning']	['ML Categorization', 'Semantically Matching Phrases', 'Phase I Trial', 'First Entry in Human', 'Initial Clinical Study']	Patents, Patent Department Support	Patent Processing	No	Other	Natural Language Processing	Standard Data	Tokenization, Labeling, Sentence Splitting	Lack of Training Data	News	8	18537	BERT, Large Dataset
Automated Risk Extraction and Categorization from Internal Documents Using Semantic Similarity and NLP Techniques at XXXXXXXX, Deployed on AWS with Tableau Visualization	The project "Risk Extraction" at ХХХХХХХХ focuses on extracting and categorizing risks from internal documents using semantic similarity techniques. The project is deployed on the cloud (AWS, ECAS) with visualization through Tableau and is currently in the production phase, with 90% of the endpoint reached. The project employs SpaCy for NLP, with workflows managed by Kubeflow and manual evaluatio…		2022	0	Base	7	30	Project achieved 90% endpoint with successful automation of risk document processing using SpaCy and Kubeflow. Key challenge: terminology standardization.	- Project Overview: - Name: Semantic Similarity Across Project/Molecule-Risk - NLP Type: Semantic similarity across project/molecule-risk - NLP Subtype: NLP-preprocessing, vectorization, similarity score - Project Level: Production - Project Phase: Production implementation being finalized - Expected Endpoint: Extract risk for a given project/molecule, assign to risk-categories, show similar risk…		['English']	Cloud (AWS, ECAS) for compute, visualization Tableau	Yes	Yes	Yes	Yes	Unknown	Yes	build		Cloud	(, ecas) for compute, visualization tableau	Production	In Progress	Other - 1.5	['SpaCy']	90	Private	Internal Documents (Risk Registry)	verification	verification by subject matter expert (customer), relevance of records	Kubeflow	Scikit-learn	Manual Evaluation	Unknown	['Semantic Similarity']	['Relationship Extraction', 'Vectorization']	Risk Extraction	Automated Processing	Yes	Unknown	Standardization, Terminology Standardization	Human Evaluation, SME Data Curation	Tokenization, Preprocessing	Terminology Issues	Research Data, Risk Registry	7	30	Unsupervised, No Training Set Required
ClusterizeIT: Empowering Data-Driven Decisions through Self-Service NLP for Sentiment Analysis and Clustering Using Internal Employee Data at XXXXXXXX	The project "ClusterizeIT" by XXXXXXXXX, is a web server cloud-based (ECAS) initiative aimed at providing a self-service NLP platform for exploratory analysis. The project, completed as a Proof of Concept (PoC), utilized algorithms such as Transformers, R, UMAP, and HDBSCAN for sentiment analysis, clustering, and relationship extraction. The primary data source comprised internal CSV files from e…		2022	0	Research	2	50	Developed self-service NLP for exploratory analysis using Transformers, UMAP, and HDBSCAN. Faced challenges in user engagement and scalability. Future focus: clearer business cases.	- Platform Goal: Exploratory analysis using self-service NLP for text preprocessing, topic modeling/clustering, and sentiment analysis. - NLP Type: Self-service NLP - NLP Subtypes: Text preprocessing, topic modeling/clustering, sentiment analysis - Project Level: MVP - Project Phase: Completed - Expected Endpoint: Self-service NLP solution empowering employees (technical and non-technical) to mak…		['English']	Web server cloud-based (ECAS)	Unknown	Unknown	Unknown	Unknown	No	Unknown	build		Cloud	-based (ecas)	PoC	Completed	Other - 1	['Transformers', 'R', 'UMAP', 'HDBSCAN']		Private	Internal Data From Employees In The Form Of Csv Files	usage metrics	increasing number of users actively using the platform to generate value for business use cases across business processes	Custom Pipeline	Unknown	Manual Evaluation	Other	[]	['Sentiment Analysis', 'Clustering', 'Relationship Extraction']	Self-Service NLP	Self-Service NLP	No	Business Case Clarity	Experimentation, Business Use Cases, User Journeys	User Self-Evaluation	Other	Unknown	Heterogeneous Data Sources	2	50	Unsupervised
Proof of Concept for NLP-Based Concept Extraction and Tagging to Analyze and Mitigate Manufacturing Deviations at XXXXXXXX, Aiming for Zero Deviations with High Precision and Recall	The project, led by XXXXXXXX, is a Proof of Concept (PoC) focused on concept extraction (taxonomy extraction) and concept tagging (document classification) using NLP techniques. The project is currently in progress, with an endpoint reached percentage of 30%. The primary data source is the Documentum Document Management System, and the expected endpoint is to gain insights into manufacturing devi…		Unknown	0	Manufacturing	Unknown	Unknown	NLP-based concept extraction and tagging for manufacturing deviations at XXXXXXXX. High recall and precision needed. Manual analysis impractical. Progress ongoing.	- Project Type: Concept Extraction (Taxonomy Extraction), Concept Tagging (Document Classification) - NLP Type: Concept extraction (taxonomy extraction), concept tagging (document classification) - Project Level: MVP - Project Phase: In progress - Expected Endpoint: Insight into manufacturing deviation trends to inform alleviation and mitigation measures, aiming to reduce deviations to zero - Suc…		[None]		Unknown	Unknown	Unknown	Unknown	Unknown	Unknown	unknown				PoC	In Progress	Other	[]	30	Private	Documentum Document Management System	unknown	unknown	Unknown	Unknown	Unknown	Unknown	[]	[]	Other	Unknown	No	Unknown	Unknown	Unknown	Unknown	Unknown	Unknown	Unknown	Unknown	Unknown
Developing a Text Classification and Relationship Extraction Model for Healthcare Professional Feedback to Enhance Patient-Centric Trials: A Proof of Concept by XXXXXXXX	The project, led by XXXXXXXX, is a Proof of Concept (PoC) focused on text classification and relationship extraction using algorithms such as R, Linguamatics I2E, and SpaCy. The project is currently in progress and aims to develop a classification model to predict labels for new healthcare professional (HCP) feedbacks, with the expected endpoint being patient-related content to support patient-ce…		Unknown	0	Social media listening	7	25	Successful text classification PoC for HCP feedback using R, I2E, SpaCy. Achieved business goals, faced data quality issues, medium effort-value ratio.	- Project Type: Text Classification - NLP Type: Text Classification - Project Level: PoC/MVP - Project Phase: In progress - Expected Endpoint: Classification model to predict labels for new HCP feedbacks - Success Criteria: F1 score - Success Achieved: Yes - Higher Business Goals: - Saving money (avoid paying an external company) - Improve communication strategy - Better understanding of customer…		[None]		Partially Yes	Yes	Partially Yes	Unknown	Unknown	Yes	unknown				PoC	In Progress	Other - 3	['R']	70	Private	Crm / Excel Files	f1 score	f1 score	Data Pipeline	Scikit-learn, Transformers	Human Evaluation, Cross Validation	Unknown	['Text Classification']	[]	Classification Model	Cost Saving	Yes	Unknown	EDA	Unknown	Stopword Removal	Data Quality Issues, Class Imbalance	Free Text	7	25	Unknown
key patient-related content from social media posts: disease name, symptoms, age, gender, location	key patient-related content from social media posts: disease name, symptoms, age, gender, location		Unknown	0	Social media listening	Unknown	20	Successful text classification PoC for HCP feedback using R, I2E, SpaCy. Achieved business goals, faced data quality issues, medium effort-value ratio.			[None]		Unknown	Unknown	Unknown	Unknown	Unknown	Unknown	Unknown	Unknown	Unknown	Unknown	Unknown	Unknown	Unknown	Unknown	Unknown	Unknown	Unknown	Unknown	Unknown	Unknown	Unknown	Unknown	Unknown	Unknown	[]	Unknown	Unknown	Unknown	Unknown	Unknown	Unknown	Unknown	Unknown	Unknown	Unknown	20	Unknown
Proof of Concept for NLP-Based Concept Extraction and Tagging to Analyze and Mitigate Manufacturing Deviations at XXXXXXXX, Aiming for Zero Deviations with High Precision and Recall	The project, led by XXXXXXXXX, is a Proof of Concept (PoC) focused on concept extraction (taxonomy extraction) and concept tagging (document classification) using NLP techniques. The project is currently in progress, with an endpoint reached percentage of 30%. The primary data source is the Documentum Document Management System, and the expected endpoint is to gain insights into manufacturing dev…		Unknown	0	Manufacturing	7	1000	NLP-based concept extraction and tagging for manufacturing deviations at XXXXXXXX. High recall and precision needed. Manual analysis impractical. Progress ongoing.	- Project Type: Concept Extraction (Taxonomy Extraction), Concept Tagging (Document Classification) - NLP Type: Concept extraction (taxonomy extraction), concept tagging (document classification) - Project Level: MVP - Project Phase: In progress - Expected Endpoint: Insight into manufacturing deviation trends to inform alleviation and mitigation measures, aiming to reduce deviations to zero - Suc…		[None]		Yes	Unknown	Yes	Yes	Unknown	Yes	build				PoC	In Progress	Other - 2	[]	80	Private	Trackwise	precision	recall and precision	Unknown	Unknown	Unknown	Unknown	[]	[]	Manufacturing Deviation Trends	Manufacturing Deviation Reduction	No	Unknown	Unknown	Unknown	Unknown	Unknown	Unknown	7	1000	Unknown
Building a Semantic Web for Enhanced Efficiency by Integrating Key Information IDs Across XXXXXXXX's Internal Systems Using Advanced NLP and OCR Technologies	The project at XXXXXXXX, is currently in the production phase and aims to build a Semantic Web across all key information IDs within the company's internal systems. The project is designed to increase efficiency and has reached 80% of its expected endpoint. The primary data sources include internal databases such as Veeva, LIMS, ELNs, and external sites like NIH and PubChem. The project utilizes …		Unknown	0	Research	9	20000	Project aimed to build a Semantic Web for efficiency. Key challenges included poor quality scans. Used SciByte algorithm with OCR and NER. High maturity rating.	- Named Entity Recognition (NER) - NLP Type: Named Entity Recognition - Project Level: Production - Project Phase: In progress - Expected Endpoint: Build a Semantic Web across all key information IDs across dozens of internal systems on a production search engine - Success Criteria: % of keys integrated with 90% accuracy - Higher Business Goals: Increase efficiency - Overall Maturity Rating: 9 - …		[None]		Yes	Yes	Yes	Yes	Unknown	Yes	unknown				Production	In Progress	Internal - 2	['Scibyte']	80	Private	Internal Databases, E.G. Veeva, Documents, Lims, Elns, But Also External Sites Like Nih Or Pubchem	other	% of keys integrated with 90% accuracry	OCR, Translation	Always Latest	Manual Evaluation	Check Open Source	['NER', 'Relationship Extraction', 'Entity Recognition']	[]	Semantic Web	Efficiency Increase	Unknown	Other	NER	Multi-Year Project	Other	Poor Quality Scans	Other	9	20000	Unknown
Automated Extraction of Key Execution Parameters from Scientific Texts Using SpaCy: A Proof of Concept for Enhancing Time and Cost Efficiency in Data Transfer and Reproducibility	The project titled "Extraction of Key Execution Parameters" was conducted by XXXXXXXXX. The project, which was a Proof of Concept (PoC) and completed in 2021, aimed to achieve significant time and cost savings through automated data transfer and increased reproducibility. The primary data sources included USP Monographs, CAS documents, and Elsevier manuscripts, all of which were in free text form…		2021	0	Research	Unknown	Unknown	Project aimed to automate extraction of key parameters from scientific texts using SpaCy. Challenges included unsupervised approach limits and suboptimal PDF use. Achieved 40% endpoint. Future needs clear target definitions and further scoping. Build technology in-house.	- Project Type: Named Entity Recognition (NER) - NLP Type: Named Entity Recognition - Project Level: Proof of Concept (PoC) - Project Phase: Ended - Expected Endpoint: Ability to translate text or semi-structured methods to machine-readable instructions - Success Criteria: Not specified - Success Achieved: Not successful - Higher Business Goals: Significant time and cost savings through automated…		['English']		No	No	No	Unknown	Unknown	No	build				PoC	Completed	External - 1	['SpaCy']	40	Public	Usp Monographs, Cas Documents, Elsevier Manuscripts	other	>	Unknown	Transformers, Classic Approach	Human Evaluation	Scoping Needed	['NER', 'Relationship Extraction', 'Entity Recognition']	[]	Text Translation	Time and Cost Saving	No	Clear Definition	Semi-Supervised Approach	Unknown	Unknown	Unsupervised Approaches	Free Text	Unknown	Unknown	Unknown
Enhancing Accuracy and Reducing Noise in Literature Searches: A Proof of Concept Using BioBERT for Ambiguous Mention Evaluation in Medline Abstracts by XXXXXXXX and QuantiPHI	The project, conducted by XXXXXXXX, aimed to develop a Proof of Concept (PoC) system for evaluating ambiguous mentions in Medline abstracts, with the goal of increasing accuracy over the existing pipeline and reducing noise in central literature searches. The project was completed in 2022 and involved a team of five full-time equivalents (FTEs) from QuantiPHI. The primary algorithm used was BioBE…		2022	0	Research	4	200	BioBERT in custom pipeline improved accuracy for ambiguous mentions in Medline abstracts. Manual evaluation crucial. Data quality and training data were challenges.	- Project Level: PoC - Project Phase: Completed - Expected Endpoint: System for evaluating ambiguous mention - Success Criteria: Increasing accuracy over existing pipeline - Higher Business Goals: Reduce noise in the central literature searching - Overall Maturity Rating: 4 - Customer Size: 200 - FTEs Involved: 5 - Training Set / Source: Reduce noise in the central literature searching - Primary …		['English']		No	No	Yes	Yes	Unknown	Yes	unknown				PoC	Completed	Other - 5	['BioBERT']	50	Public	Medline Abstracts	accuracy	increasing accuracy over existing pipeline	Custom Pipeline	Other	Manual Evaluation	Unknown	['Entity Linking']	[]	Ambiguous Mention Evaluation	Noise Reduction	Unknown	Unknown	Unknown	Manual Evaluation	Pipeline	Other	PubMed, Gene-Disease Hits	4	200	Noise Reduction
build ontology and populate knowledge graph for sample and associated properties to enable data search, aggregation, and modeling (capture entities and events)	build ontology and populate knowledge graph for sample and associated properties to enable data search, aggregation, and modeling (capture entities and events)		2022	0	Research	2	200	Project aims to develop a BioBERT-powered knowledge graph for compound tracking. Key challenges include noisy data and duplicate removal. Future steps focus on improved QC and semantic extraction.			[None]		Unknown	200	Project aims to develop a BioBERT-powered knowledge graph for compound tracking. Key challenges include noisy data and duplicate removal. Future steps focus on improved QC and semantic extraction.	Unknown	Unknown	Unknown	Unknown	Unknown	Unknown	Unknown	Unknown	Unknown	Unknown	Unknown	Unknown	Unknown	Unknown	Unknown	Unknown	Unknown	Unknown	Unknown	Unknown	Unknown	Unknown	Unknown	Unknown	Unknown	Unknown	Unknown	Unknown	Unknown	Unknown	Unknown	2	200	Unknown
Developing a BioBERT-Powered Knowledge Graph for Efficient Compound Tracking via Named Entity Recognition and Relationship Extraction in Chemical Reaction Data	ХХХХХХХХ is currently undertaking a Proof of Concept (PoC) project focused on Named Entity Recognition (NER) and Relationship Extraction using BioBERT algorithms. The project, which is in progress, aims to build a knowledge graph and ontology for compound tracking by ingesting data from disparate source systems, both structured and unstructured, with a success criterion of over 85% for unstructur…		2022	0	Research	3	500	Project aims to develop a BioBERT-powered knowledge graph for compound tracking. Key challenges include noisy data and duplicate removal. Future steps focus on improved QC and semantic extraction.	- Project Overview: - NLP Type: Named Entity Recognition - Project Level: Proof of Concept (PoC) - Project Phase: In progress - Expected Endpoint: All internal and external chemical reaction knowledge (entities and properties) exist in an easily searchable hub/graph - Success Criteria: >95% search success in finding chemical reaction data regardless of source (internal/external) - Higher Business…		['English']		Unknown	Yes	No	Yes	Unknown	Yes	unknown				PoC	In Progress	Internal - 7	[]	20	Private	Patent, Cjhif, Home Built Eln, And Idbs Eln	search success	>95% search success in finding chemical reaction data regrardless of source (int/ext)	Unknown	Unknown	Unknown	Unknown	['NER', 'Relationship Extraction', 'Entity Recognition']	[]	Chemical Reaction Knowledge	Efficiency Gains	Unknown	Improved QC, Labeling, Semantic Extraction	Duplicate Removal	Automated Matching, Quality Checks	Prune Incomplete Data	Other	Text and Chemical Structures, SMILES, MOL Files	3	500	Unknown
Enhancing Research Efficiency through Web-Based NLP for Ingesting, Enriching, and Mapping Diverse Data Sources in Legacy Document Analysis at XXXXXXXX	The project "Target Search for Legacy Documents" at ХХХХХХХХ, aims to enhance research efficiency by developing a web server-based application for ingesting, enriching, and mapping data from diverse sources such as Elsevier, Global Data, PubMed, internal data sources, GWAS, and GEO. The project is currently in the production phase with a maturity rating of 9 and involves a team of two internal FT…		2022	0	Research	9	50	Enhanced research efficiency via web-based NLP for diverse data ingestion, achieving 90% mapping success. Key challenges: metadata indexing, data augmentation.	- Project Overview: - NLP Type: Named Entity Recognition - NLP Subtype: Drugs, proteins, gene ontology, biomarkers, anatomies, indications, MOA, lab procedures - Project Level: Production - Project Phase: Operations - Expected Endpoint: - Reliable co-correlations for indication, therapy, disease, product - Identification of clinical trial/study names regardless of capitalization - Success Criteri…		['English']	Web server	Yes	Yes	Yes	Yes	Unknown	Yes	build		Web Server		Production	In Progress	Internal - 2	['SciBite']		Private	Elsevier, Global Data, Pubmed, Internal Data Sources, Gwas, Geo	ingestion	ingestion, enrichment and mapping of data from disparate sources internal and external sources (fee and free / structured and unstructured) with 90% success in mapping and co-occurrences	Sinequa, TERMite, CENtree	Unknown	Human Evaluation	LLM	['NER', 'Relationship Extraction', 'Entity Recognition']	['Relationship Extraction']	Co-Correlations	Research Efficiency	Yes	Other	Other	Manual Evaluation, Test Queries	Mapping	Metadata Issues, Data Augmentation	Free Text, Controlled Vocabularies	9	50	Unknown
Enhancing Productivity through Patient Sentiment Insights: A Web-Based NER and Relationship Extraction Project by XXXXXXXX	The project "Patient Sentiment Discovery" by ХХХХХХХХХ, aims to extract sentiment insights from internal data sources using Named Entity Recognition (NER) and relationship extraction techniques. The project is deployed on a web server and is currently in the production phase with a maturity rating of 2. The internal team consists of three full-time equivalents (FTEs). The primary algorithms used …		2023	0	Research	2	50	Objective: Extract sentiment insights using NER and relationship extraction. Entities Recognized: Drugs, proteins, gene ontology, biomarkers, anatomies, indications, MOA, lab procedures. Algorithms: SciBite, workflows: Sinequa, TERMite, CENtree, evaluated by humans. Challenges: Limited patient feedback data. Outcome: Successful for developers, business success unknown. Recommendation: Buy rather …	- Project Type: Named Entity Recognition - Entities Recognized: Drugs, Proteins, Gene Ontology, Biomarkers, Anatomies, Indications, Mechanism of Action (MOA), Lab Procedures - NLP Type: Named Entity Recognition - NLP Subtype: Drugs, Proteins, Gene Ontology, Biomarkers, Anatomies, Indications, MOA, Lab Procedures - Project Level: Production - Project Phase: Operations - Expected Endpoint: Reliable…		['English']	Web server	Yes	Unknown	Yes	Yes	Unknown	Unknown	buy		Web Server		Production	In Progress	Internal - 3	['SciBite']		Private	Internal	other	tbd	Sinequa, TERMite, CENtree	Unknown	Human Evaluation	LLM	['NER', 'Relationship Extraction', 'Entity Recognition']	['Relationship Extraction']	Sentiment Insights	Productivity	In Progress	Unknown	Unknown	Unknown	Unknown	Limited Feedback	Unknown	2	50	Unknown
Enhancing Strategy and Competitive Intelligence with Advanced Document Search and NLP Techniques in the Disease Portal Project by XXXXXXXX	The "Disease Portal" project by ХХХХХХХХ, aims to enhance strategy and competitive intelligence by searching for relevant documents. This web server-deployed project, currently in progress at the production level, involves a team of two internal full-time employees. The primary data sources include Elsevier, Global Data, PubMed, internal data sources, GWAS, and GEO. The project utilizes SciBite a…		2022	0	Research	3	50	Key insights: Enhanced strategy and competitive intelligence via robust document search. Web server deployment ensured accessibility. Diverse private data sources utilized. SciBite algorithms with Sinequa, TERMite, CENtree workflows. Focused on NER, Relationship Extraction, Entity Recognition. Methodologies: Human evaluation for accuracy. Standardized NLP for consistency. Data augmentation refine…	- Project Information: - NLP Type: Named Entity Recognition - NLP Subtype: Drugs, proteins, gene ontology, biomarkers, anatomies, indications, MOA, lab procedures - Project Level: Production - Project Phase: Operations - Expected Endpoint: - Reliable co-correlations for indication, therapy, disease, product - Identification of clinical trial/study names regardless of the capitalization of input t…		['English']	Web server	Yes	Yes	Yes	Yes	Unknown	Yes	build		Web Server		Production	In Progress	Internal - 2	['SciBite']		Private	Elsevier, Global Data, Pubmed, Internal Data Sources, Gwas, Geo	unknown	unknown	Sinequa, TERMite, CENtree	Unknown	Human Evaluation	LLM	['NER', 'Relationship Extraction', 'Entity Recognition']	['Relationship Extraction']	Co-Correlations	Productivity	In Progress	Unknown	Other	Unknown	Unknown	Metadata Issues, Data Augmentation	Unknown	3	50	Unknown
Build an expert finding tool that extracts expertise and builds profiles automatically based on document authorship and that allows semantic search for experts	Build an expert finding tool that extracts expertise and builds profiles automatically based on document authorship and that allows semantic search for experts		Unknown	0	Research	6	18000	Advanced NLP techniques improved health authority submissions' quality and speed. Key challenges included domain-specific language and missing context. Future steps: few-shot learning, Auto-ML.			[None]	Unknown	Unknown	Unknown	Unknown	Unknown	Unknown	Unknown	Unknown	Unknown	Unknown	Unknown	Unknown	Unknown	Unknown	Unknown	Unknown	Unknown	Unknown	Unknown	Unknown	Unknown	Unknown	Unknown	Unknown	Unknown	Unknown	Unknown	Unknown	Unknown	Unknown	Unknown	Unknown	Unknown	Unknown	Unknown	6	18000	Unknown
Enhancing Health Authority Submissions with Semantic Search and Concept Trend Visualization: A Proof of Concept Utilizing Advanced NLP Techniques and Custom Taxonomies by XXXXXXXX	The project, led by ХХХХХХХХ, aims to enhance the quality and speed of health authority submissions by visualizing concept trends and enabling semantic search through past submissions. The project is currently at the Proof of Concept (PoC) level and is in progress, with an 80% endpoint reached. The primary data source is a Q&A database, and the project involves two full-time equivalents (FTEs). T…		Unknown	0	Regulatory Compliance	8	500	Advanced NLP techniques improved health authority submissions' quality and speed. Key challenges included domain-specific language and missing context. Future steps: few-shot learning, Auto-ML.	- Project Overview: - Objective: Provide insight into concepts and trends relevant in health authority submissions by visualizing concept trends and making relevant information findable through semantically searching past submissions. - NLP Type: Concept tagging, semantic search. - Project Level: MVP. - Project Phase: In progress. - Success Criteria: Recall and precision. - Higher Business Goals:…		[None]		Yes	Yes	Yes	Yes	Unknown	Yes	build				PoC	In Progress	Other - 2	['TextRank', 'R', 'HDBSCAN', 'Deep Learning', 'UMAP', 'Word2Vec', 'Graph Embedding', 'Transformers']	80	Unknown	Q&A Database	precision	recall and precision	NLP Pipeline	SpaCy, Transformers, TensorFlow, PyTorch	Manual Evaluation, Precision, Recall	Few-Shot Learning, Auto-ML	['Semantic Search']	[]	Concept Trends	Quality Improvement	Unknown	Improved Sampling	Exploratory Data Analysis, Phrase Classification	Manual Evaluation, Automated Reporting	Other	Domain-Specific Language, Missing Context	Free Text, Domain-Specific Content	8	500	Unknown
Leveraging AI and NLP for Real-Time Medical Insights: A Production-Level Initiative by XXXXXXXX to Automate Classification and Analysis of HCP and KOL Interactions	The project undertaken by ХХХХХХХХХ involves leveraging AI and NLP technologies to convert an increasing volume of free-text records into real-time insights using ХХХХ, an in-house analytics hub. The project, which is currently in progress and at the production level, aims to significantly reduce manual work for classification, analysis, and synthesis of medical insights derived from interactions…		2020	0	Research	8	Range	Project achieved 80% endpoint, reducing manual work significantly. Utilized Pandas, NLTK, SparkNLP, SpaCy. High maturity rating (8). Informed healthcare strategies.	- Project Overview: - NLP Types: Natural Language Understanding, Multi-Label Text Classification, Named Entity Recognition - NLP Subtypes: Auto-tagging text into multi-level hierarchies, Named Entities like Studies, Congress, Product, Medical Condition, etc. - Project Level: Production - Project Phase: In Progress - Expected Endpoint: Convert increasing volume of free-text records into real-time …		['English']	On premise + Cloud based	Yes	Yes	Yes	Yes	Unknown	Unknown	build		On Premise	+ based	Production	In Progress	Internal - 5	['Pandas', 'NLTK', 'SparkNLP', 'SpaCy']	80	Private	Internal Database	other	tbd	TBD	TBD	Manual Evaluation, Test Set Evaluation	TBD	['NER', 'Text Classification', 'Relationship Extraction', 'Entity Recognition']	['Relationship Extraction', 'Auto Tagging']	Insights Generation	Other	Yes	Unknown	Unknown	Unknown	Unknown	Unknown	Medical Insights	8	Range	Semi-Supervised
Leveraging AI and NLP for Patient and Caregiver Insights in Cancer Treatment: A Multilingual, On-Premise and Cloud-Based PoC by XXXXXXXX	The project undertaken by ХХХХХХХХ aimed to develop and utilize AI solutions to gather insights on patients' and caregivers' experiences with cancer diseases and treatments, thereby informing Patient-Focused Drug Development (PFDD) strategies. The project, which was multilingual and deployed both on-premise and cloud-based, successfully met the needs of both developers and business stakeholders, …		2021	0	Clinical	8	Range	Leveraged AI/NLP for cancer treatment insights from social media, achieving 80% endpoint reach. Employed NER, text classification, and semi-supervised training.	- Project Overview: - Objective: Develop and utilize AI solutions to gather insights on patients' and caregivers' experiences with cancer diseases and treatments to inform PFDD strategies. - Immediate Next Steps: Incorporate learnings from this research into additional tumor types, therapeutic areas, and data sources. - Higher Business Goals: Enhance drug development efforts by including patient …		['Multilingual']	On premise + Cloud based	Yes	Yes	Yes	Yes	Unknown	Unknown	build		On Premise	+ based	PoC	Completed	Internal - 5	['R', 'RoBERTa', 'Pandas', 'NLTK', 'SparkNLP', 'SpaCy', 'BART']	80	Public	External - Social Media	other	tbd	TBD	TBD	Manual Evaluation, Test Set Evaluation	TBD	['NER', 'Text Classification', 'Relationship Extraction', 'Entity Recognition']	['Text Classification', 'Negative Learning']	Scalable SML Tools	Drug Development	Unknown	Unknown	Unknown	Unknown	Unknown	Unknown	Social Media Posts, Tweets	8	Range	Semi-Supervised, 70/30 Split
Leveraging NLP to Reduce Manual Analysis Time and Costs in Multilingual Medical Inquiries: A Cloud and On-Premise Solution by XXXXXXXX	ХХХХХХХХ project, running from 2020 to 2021, focuses on leveraging Natural Language Processing (NLP) techniques to handle unstructured medical information inquiries within the organization. The project aims to reduce manual analysis time by 30% to 50%, achieve significant labor cost savings (approximately a few hundred thousand euros per annum), and provide near-real-time insights with a turnarou…		2020	0	Clinical	9	Range	Effective NLP techniques reduced manual analysis time by 30-50%, achieved significant labor cost savings, and provided near-real-time insights.	- Project Focus: - Natural Language Understanding, Key Phrase Extraction, Named Entity Recognition - Medical Information Function within the organization - Handling unstructured medical information inquiries from multiple communication channels - NLP Techniques: - Natural Language Understanding - Key Phrase Extraction - Named Entity Recognition (indications, products, side effects, lab tests, etc…		['Multilingual']	On premise + Cloud based	Yes	Yes	Yes	Yes	Unknown	Unknown	build		On Premise	+ based	Production	Not Started	Internal - 7	['NLTK', 'Topic Rank', 'SparkNLP', 'SpaCy', 'PKE']	80	Private	Internal Database	other	tbd	TBD	TBD	Manual Evaluation, Test Set Evaluation	TBD	['NER', 'Relationship Extraction', 'Key Phrase Extraction', 'Entity Recognition']	['Key Phrase Extraction']	Insights Generation	Other	Unknown	Unknown	Unknown	Unknown	Unknown	Unknown	Medical Information Inquiries	9	Range	Semi-Supervised
Enhancing Employee Experience with a Cloud-Based Self-Serving Chatbot: A Proof of Concept Using Advanced NLP Models at XXXXXXXX	ХХХХХХХ is currently undertaking a Proof of Concept (PoC) project, deployed on cloud platforms such as AWS or Azure, aimed at enhancing employee experience through a self-serving chatbot. The project, which began in 2021 and is still in progress, involves the use of advanced NLP models for sentiment analysis, relationship extraction, and medical keyword extraction. The chatbot is designed to answ…		2021	0	Clinical	5	Range	Key insights: - Advanced NLP models are central to enhancing employee experience. - The project is in the Proof of Concept phase, with success criteria yet to be defined. - Expected to support 2,000+ employees, indicating significant impact. - Cloud deployment ensures scalability and accessibility.	- NLP Models: - For extraction - For sentiment analysis - Questions and Answers service - Disambiguation - Coreferencing - Project Details: - Project Level: Proof of Concept (PoC), Minimum Viable Product (MVP) - Project Phase: In Progress - Expected Endpoint: - Self-serving chatbot to answer any questions for employees - Wholly designed conversational AI framework - NLP tool deployment for medica…		['Multilingual']	On Cloud (AWS or Azure)	Unknown	Unknown	Unknown	Unknown	Unknown	Unknown	unknown		Cloud	on ( or )	PoC	In Progress	Other - 2	[]		Private	Internal Company Database	other	tbd	Unknown	Unknown	Unknown	Unknown	['Sentiment Analysis', 'Relationship Extraction', 'NLP Models']	['Sentiment Analysis', 'Relationship Extraction', 'NLP Models']	Self-Serving Chatbot	Employee Experience	No	Unknown	Unknown	Unknown	Unknown	Unknown	Unknown	5	Range	Unknown
Automating Multilingual Text Classification of Health Authority Interactions Using PubMedBERT on AWS Cloud to Enhance Operational Efficiency and Generate Insights	The project, conducted by ХХХХХХХ, involved deploying a multilingual text classification system on AWS Cloud. The project, which was at the production level and completed between 2021 and 2022, aimed to automate the classification of interactions with health authorities. The primary data source consisted of manually annotated internal documents, and the project utilized the PubMedBERT algorithm, …		2021	0	Regulatory Compliance	10	Unknown	Automated text classification using PubMedBERT on AWS improved operational efficiency and generated insights from health authority interactions.	- Project Type: Text Classification - NLP Type: Text Classification - Project Level: Production - Project Phase: Completed - Expected Endpoint: Automated classification of interactions with health authorities - Success Criteria: User feedback - Success Achieved: Yes - Higher Business Goals: Operational efficiency - Overall Maturity Rating: 8 - Customer Size: 100+ - FTEs Involved: 2 - Primary Data…		['English']	Cloud (AWS)	Unknown	Unknown	Unknown	Unknown	Unknown	Unknown	unknown		Cloud	()	Production	Completed	Other - 7	['Transformers', 'PubMedBERT']	100	Private	Internal Database	accuracy	accuracy	MLOps Pipeline	Unknown	Human Evaluation	Unknown	['Text Classification']	[]	Automatic Mapping	Cost Reduction, Efficiency Increase	Yes	Unknown	Unknown	Unknown	Unknown	Unknown	Medical Coders Data	10	Unknown	Unknown
Global detection of topics in medical inquiries	Global detection of topics in medical inquiries		2020	0	Regulatory Compliance	9	Range	Automated text classification using PubMedBERT on AWS improved operational efficiency and generated insights from health authority interactions.			Unknown	Unknown	Unknown	Unknown	Unknown	Unknown	Unknown	Unknown	Unknown	Unknown	Unknown	Unknown	Unknown	Unknown	Unknown	Unknown	Unknown	Unknown	Unknown	Unknown	Unknown	Unknown	Unknown	Unknown	Unknown	Unknown	Unknown	Unknown	Unknown	Unknown	Unknown	Unknown	Unknown	Unknown	Unknown	Unknown	9	Regulatory Compliance	Unknown
gain insights in MSL discussion notes	gain insights in MSL discussion notes		2021	0	Regulatory Compliance	9	Range	Automated text classification using PubMedBERT on AWS improved operational efficiency and generated insights from health authority interactions.			Unknown	Unknown	Unknown	Unknown	Unknown	Unknown	Unknown	Unknown	Unknown	Unknown	Unknown	Unknown	Unknown	Unknown	Unknown	Unknown	Unknown	Unknown	Unknown	Unknown	Unknown	Unknown	Unknown	Unknown	Unknown	Unknown	Unknown	Unknown	Unknown	Unknown	Unknown	Unknown	Unknown	Unknown	Unknown	Unknown	9	Regulatory Compliance	Unknown
Enhancing Operational Efficiency and Insights Generation Using Advanced NLP Techniques on AWS Cloud: A XXXXXXXX Production Phase Project Leveraging Internal Databases and User Feedback	ХХХХХХХ is currently undertaking a cloud-based project on AWS, aimed at enhancing operational efficiency and generating insights. The project, which is in the production phase and started in 2022, involves a team of five full-time equivalents (FTEs). The primary data sources are internal databases, and the project leverages advanced NLP techniques such as text extraction, semantic search, text em…		2022	0	Research	7	Unknown	Advanced NLP on AWS enhances operational efficiency and insights. Internal databases, user feedback, and a dedicated team drive success. Maturity rating: 7.	- Information: Text Extraction, NER, Question-Answering, Advanced APIs - NLP Type: Text extraction, NER, semantic search - NLP Subtype: Text embeddings, question-answering, advanced APIs - Project Level: Production - Project Phase: In Progress - Expected Endpoint: Insights generation for selected brands - Success Criteria: User feedback - Success Achieved: Yes - Higher Business Goals: Insights ge…		['English']	Cloud (AWS)	Unknown	Unknown	Unknown	Unknown	Unknown	Unknown	unknown		Cloud	()	Production	In Progress	Other - 5	[]		Private	Internal Databases	user feedback	user feedback	Unknown	Unknown	Unknown	Unknown	['Text Extraction', 'Semantic Search']	['Text Embeddings', 'Advanced APIs']	Insights Generation	Operational Efficiency, Insights Generation	Yes	Unknown	Unknown	Unknown	Unknown	Unknown	Unknown	7	Unknown	Unknown
Automating Multilingual Text Classification of Health Authority Interactions Using PubMedBERT on AWS Cloud to Enhance Operational Efficiency and Generate Insights	The project, conducted by ХХХХХХХХХ, involved deploying a multilingual text classification system on AWS Cloud. The project, which was at the production level and completed between 2021 and 2022, aimed to automate the classification of interactions with health authorities. The primary data source consisted of manually annotated internal documents, and the project utilized the PubMedBERT algorithm…		2022	0	Regulatory Compliance	8	Range	Automated text classification using PubMedBERT on AWS improved operational efficiency and generated insights from health authority interactions.	- Project Type: Text Classification - NLP Type: Text Classification - Project Level: Production - Project Phase: Completed - Expected Endpoint: Automated classification of interactions with health authorities - Success Criteria: User feedback - Success Achieved: Yes - Higher Business Goals: Operational efficiency - Overall Maturity Rating: 8 - Customer Size: 100+ - FTEs Involved: 2 - Primary Data…		['English']	Cloud (AWS)	Unknown	Unknown	Unknown	Unknown	Unknown	Unknown	build		Cloud	()	Production	Completed	Other - 2	['PubMedBERT']		Private	Manually Annotated Internal Data	user feedback	user feedback	Unknown	Unknown	Human Evaluation	Unknown	['Text Classification']	[]	Automated Classification	Operational Efficiency	Yes	Unknown	Unknown	Unknown	Unknown	Unknown	Health Authority Interaction Documents	8	Range	Unknown
Automating Pharma Complaint Intake with Keyword Extraction and Entity Mapping NLP on GCP and gChat Integration by XXXXXXXX	The project, conducted by ХХХХХХХХХ, involved integrating a keyword extraction and entity mapping NLP system into Google Cloud Platform (GCP) and gChat. The project, which was completed in 2021, aimed to automate the intake process for pharma complaints, leveraging data from Condor and Phoenix. The deployment was cloud-based and reached a production level, achieving a 100% endpoint success rate. …		2021	0	Regulatory Compliance	7	Range	Automated pharma complaint intake using NLP on GCP and gChat achieved 100% success, saving 1 FTE. Key challenges included missing terminology.	- Project Overview: - NLP Type: Key word extraction and Entity mapping - NLP Subtype: Pharma Complaints - Project Level: Production - Project Phase: Completed - Start-End Dates: 2021-09-01 to unspecified end date - Objectives and Success Criteria: - Expected Endpoint: Users searching and landing on the page of what they are looking for - Success Criteria: User feedback - Success Achieved: Yes - H…		['English']	GCP integrated to gChat	Yes	Yes	Yes	Yes	Yes	Yes	buy		Cloud	integrated to gchat	Production	Completed	Other - 3	['Keyword Extractor']	100	Private	Condor, Phoenix	user feedback	user feedback	Other	Unknown	Manual Evaluation, User Feedback	Unknown	['Keyword Extraction', 'Entity Mapping']	['Pharma Complaints']	Search Optimization	Automation	Yes	Unknown	Unknown	Structured Evaluation	Unknown	Missing Terminology	Pharma Complaints Documents	7	Range	Unknown
Enhancing Operational Efficiency via Text Classification and Topic Modeling of MSL Discussion Notes at XXXXXXXX: A Data-Driven Approach to Extract Market and Customer Insights	The project "Identification of MSL Insights" by ХХХХХХХХХ, aims to extract market and customer insights from MSL discussion notes using text classification and topic modeling techniques. The project is currently in progress and deployed on-premise, with a team of 10 internal FTEs. The primary data source is an internal database containing MSL discussion notes, which are anonymized and manually ev…		2022	0	Clinical	6	400	Project aimed to extract market insights from MSL notes. Challenges: complex sentences, language standardization. Algorithms: Lingo4G, TF-IDF, Logistic Regression. Low value-to-effort ratio.	- Project Overview: - Type: Text Classification, NER - NLP Type: Text classification, unsupervised topic modeling, NER - NLP Subtype: Indications, active ingredients, product classes, brands - Project Level: Production - Project Phase: In Progress - Expected Endpoint: Identification of market and customer insights from MSL discussion notes - Success Criteria: NPS score / customer survey - Success…		['English', 'Japanese']	on premise	Partially Yes	No	Yes	Yes	Yes	No	build		On Premise		Production	In Progress	Internal - 10	['Lingo4G']	30	Private	Internal Database	nps score	nps score /customer survey	Sentence Segmentation	TF-IDF, Logistic Regression	Class Probability Threshold, Precision	Retrieval Augmented Generation	['Text Classification', 'Topic Modeling']	['Relationship Extraction']	Market and Customer Insights	Operational Efficiency	No	Language Harmonization	Standardization	Manual Evaluation	Anonymization	Complex Sentences	Internal MSL Discussion Notes	6	400	Unknown
Enhancing Operational Efficiency through Emerging Trend Identification in MSL Discussion Notes Using Advanced NLP Techniques and Retrospective Evaluation	The project, led by ХХХХХХХХ, focuses on identifying emerging trends in Medical Science Liaison (MSL) discussion notes. The project is currently in progress and deployed on-premise, with support for both English and Japanese languages. It involves a team of 10 internal full-time employees and utilizes private data sourced from an internal database. The primary goal is to enhance operational effic…		2022	0	Clinical	8	400	Successfully identified trends in MSL notes, enhancing operational efficiency. High-quality data but ambiguous wording. Lingo4G effective for long-term trends.	- Project Overview: - NLP Type: Text classification, unsupervised topic modeling, NER - NLP Subtype: Indications, active ingredients, product classes, brands - Project Level: Production - Project Phase: In progress - Expected Endpoint: Identification of emerging trends in MSL discussion notes - Success Criteria: NPS score/customer survey - Success Achieved: Yes - Higher Business Goals: Operationa…		['English', 'Japanese']	on premise	Yes	Yes	Yes	Yes	Yes	Unknown	build		On Premise		Production	In Progress	Internal - 10	['Lingo4G']	30	Private	Internal Database	nps score	nps score /customer survey	Topic Combination Analysis	PyMannKendall, Scikit-learn	Retrospective Evaluation	Find Better Algorithm	['Text Classification', 'Topic Modeling']	['Relationship Extraction']	Emerging Trends Identification	Operational Efficiency	Yes	Manual Tagging, Trend Identification	High Quality Data, Topic Diversity	Manual Evaluation	Anonymization	Ambiguous Wording	Other	8	400	Unknown
Multi-Lingual MedInfo Topic Detection and Trend Analysis Using Lingo4G for Operational Efficiency at XXXXXXXX	The project, led by ХХХХХХХХ, focuses on MedInfo topic detection and trend analysis. It is an on-premise deployment supporting both English and Japanese languages. The project is currently in progress at the production level, with a team of 10 internal FTEs. The primary data source is an internal database containing medical enquiry transcripts, which are multi-lingual and partially manually trans…		2022	0	Clinical	8	10	Operational efficiency enhanced via NLP for topic detection and trend analysis. Multi-lingual data posed quality challenges. Standardized data capture needed.	- Project Overview: - NLP Type: Text classification, unsupervised topic modeling, NER - NLP Subtype: Indications, active ingredients, product classes, brands - Project Level: Production - Project Phase: In progress - Expected Endpoint: Productive use in a set number of users - Success Criteria: NPS score/customer survey - Success Achieved: Yes - Higher Business Goals: Operational efficiency - Ove…		['English', 'Japanese']	on premise	Yes	Yes	Yes	Yes	Yes	Yes	build		On Premise		Production	In Progress	Internal - 10	['Lingo4G']	30	Private	Internal Database	nps score	nps score /customer survey	Topic Combination Analysis	PyMannKendall, Scikit-learn	Retrospective Evaluation	Find Better Algorithm	['Text Classification', 'Topic Modeling']	['Relationship Extraction']	Productive Use	Operational Efficiency	Yes	Standardize Data	Data Quality, Language Skills, Data Cleaning	Manual Evaluation	Other	Multi-Lingual Data	Internal Medical Enquiry Transcripts	8	10	Unknown
Leveraging NLP for Strategic Customer Insights: A PoC on Survey Analysis Using Phi Coefficient, Fisher Z Transformation, and Lingo4G at XXXXXXXX	The project titled "Voice of the Customer for Strategic Communication" by ХХХХХХХХХ, aims to gain customer insights through survey analysis. The project is currently in the Proof of Concept (PoC) phase with a 40% endpoint reached. It is deployed on-premise and involves a team of 10 internal full-time employees. The primary data source is external survey data, focusing on text classification and t…		2021	0	Marketing	6	15	Customer insights achieved via survey analysis; NPS scores met. Algorithms used: Phi Coefficient, Fisher Z, Lingo4G. Challenges: data volume, input quality. Future: improve input, standardize data, use larger datasets.	- Project Overview: - NLP Type: Text classification, unsupervised topic modeling, NER - NLP Subtype: Voice of customer - Project Level: MVP - Project Phase: In progress - Expected Endpoint: Message recall survey analysis - Success Criteria: NPS score/customer survey - Success Achieved: Yes - Higher Business Goals: Understanding of authentic voice of the customer for strategic communication - Over…		['English']	on premise	Unknown	Yes	Partially Yes	Yes	Yes	Yes	build		On Premise		PoC	In Progress	Internal - 10	['Phi Coefficient', 'Fisher Z Transformation', 'Lingo4G']	40	Unknown	External Survey Data	nps score	nps score /customer survey	Correlation Analysis	Scikit-learn, Pandas	Retrospective Evaluation	Improve Input	['Text Classification', 'Topic Modeling']	[]	Survey Analysis	Customer Insights	Yes	No Change	Brief Text Response, Standardization	Manual Evaluation	Other	Other	Survey Results	6	15	Unknown
Leveraging Social Media Analytics for Patient-Centric Clinical Trial Design: A Completed Proof of Concept by XXXXXXXX Utilizing Text Classification and NER	The project "Listen to Patients" by ХХХХХХХХХ, aimed to leverage social media patient fora to capture the voice of the patient for clinical trial design. Conducted in English and deployed as a SaaS solution on the cloud, the project was a Proof of Concept (PoC) and has been completed. The project involved a team of five external full-time equivalents (FTEs) and utilized text classification and na…		2019	0	Clinical	3	5	Leveraging social media data enhances patient-centric clinical trial design. Ethical and compliance issues are critical. Future projects should refine NLP techniques.	- NLP Type: Text classification, NER - NLP Subtype: Patient symptoms - Project Level: Proof of Concept (PoC) - Project Phase: Completed - Expected Endpoint: Voice of the patient, social media analytics - Success Criteria: NPS score / customer survey - Success Achieved: Yes - Higher Business Goals: Patient-centric clinical trial design - Overall Maturity Rating: 3 - Customer Size: 5 - FTEs Involve…		['English']	SaaS	Unknown	Unknown	Partially Yes	Yes	Yes	Yes	unknown		Cloud		PoC	Completed	External - 5	[]	40	Public	Social Media Patient Fora	nps score	nps score /customer survey	Unknown	Unknown	Unknown	Unknown	['Text Classification']	[]	Voice of the Patient	Clinical Trial Design	Yes	Unknown	Unknown	Unknown	Unknown	Ethical and Compliance Issues	Social Media Data	3	5	Unknown
Multilingual Similarity Search on Internal Medical Enquiry Transcripts Using Apache Solr MLT for Enhanced Scientific Responses and Improved Customer Satisfaction	The project, titled "Similarity Search," is being conducted by ХХХХХХХХХХ. It is a multilingual, on-premise deployment currently in the production phase and is 80% complete. The project aims to implement a similarity search on internal medical enquiry transcripts to provide more comprehensive scientific responses to customers. The success of the project is measured by NPS scores and customer surv…		2022	0	Clinical	7	400	Project met goals with high value-to-effort ratio. Used Apache Solr MLT for similarity search. Data quality and sharing posed challenges. Future: advanced vectorizing, data standardization.	- Project Overview: - Type: Similarity search - Subtypes: NLP-preprocessing, vectorization, similarity score - Level: Production - Phase: In progress - Expected Endpoint: Similarity search on medical information enquiries - Success Criteria: NPS score/customer survey - Success Achieved: Yes - Higher Business Goals: Provide more comprehensive scientific responses to customers - Overall Maturity Ra…		['Multilingual']	on premise	Yes	Yes	Yes	Yes	Yes	Yes	build		On Premise		Production	In Progress	Internal - 10	['Apache Solr MLT']	80	Private	Internal Database	nps score	nps score /customer survey	Auto-Translation	MLT	Manual Evaluation	Advanced Vectorizing Techniques	['Similarity Search']	['Relationship Extraction', 'Vectorization']	Similarity Search	Scientific Responses	Yes	Standardize Data	Data Quality, Language Skills, Data Cleaning	Manual Evaluation	Anonymization	Data Sharing	Internal Medical Enquiry Transcripts	7	400	Unknown
Enhancing Operational Efficiency via Extractive Auto-Summarization of Medical Inquiries and MSL Discussion Notes Using Vectorization, TF-IDF, PCA, Clustering, and PageRank at XXXXXXXX	This project focuses on extractive auto-summarization, specifically auto-summarizing medical inquiries and MSL discussion notes to enhance operational efficiency. The project, currently in progress and deployed on-premise, involves a team of 10 internal FTEs and utilizes internal databases as its primary data source. The algorithms employed include vectorization, TF-IDF, PCA, clustering, and Page…		2021	0	Clinical	3	400	Algorithm effective for standardized language but not scientific. Users prefer abstractive summarization. Data issues with scientific notes. Future: use LLMs.	- Project Overview - Type: Extractive auto-summarization - Subtype: Auto-summary - Level: Production - Phase: In progress - Expected Endpoint: Auto-text summaries of medical inquiries and MSL discussion notes - Success Criteria: % accuracy - Success Achieved: No - Higher Business Goals: Operational efficiency - Overall Maturity Rating: 3 - Customer Size: 400 - FTEs Involved: 10 - Primary Data Sou…		['English']	on premise	No	No	Yes	Yes	Yes	No	build		On Premise		Production	In Progress	Internal - 10	['Extractive Summarization']	20	Private	Internal Database	accuracy	%accuracy	Vectorization, TF-IDF, PCA, Clustering, PageRank	Scikit-learn, SpaCy	Retrospective Evaluation	LLM	['Extractive Summarization', 'Summarization']	['Auto-Summary']	Auto-Text Summaries	Operational Efficiency	No	Other	Statistical Methods	Manual Evaluation	Normalization, Sentence Segmentation	Specific Wording	Internal Data	3	400	Unknown
Enhancing Medical Text Search Capabilities Using Cloud-Based NLP Techniques for Operational Efficiency at XXXXXXXX	XXXXXXXXXX is currently working on a project titled "Enhanced text searches across data sources," led by XXXXXXXX. The project aims to improve text search capabilities using cloud deployment on AWS. It is a Proof of Concept (PoC) phase project, with an external team of five full-time equivalents (FTEs) involved. The primary data sources include medical and scientific literature, as well as synthe…		2020	0	Research	7	10	Cloud-based NLP techniques enhance medical text search, achieving operational efficiency. Despite 20% endpoint reach, promising results suggest buying over building.	- NLP Type: Text classification, unsupervised topic modeling, NER - NLP Subtype: NLP models for extraction for sentiment analysis, Questions and Answers service, disambiguation, conferencing - Project Level: Proof of Concept (PoC) - Project Phase: In progress - Expected Endpoint: Intent-based search on medical content - Success Criteria: %accuracy - Success Achieved: Yes - Higher Business Goals: …		['English']	cloud / AWS	Unknown	Unknown	Yes	Yes	Yes	Unknown	buy		Cloud	/	PoC	In Progress	External - 5	[]	20	Unknown	Medical & Scientific Literature, Synthesized Medical Content Generated By XXXXXXXX	accuracy	%accuracy	Unknown	Unknown	Unknown	Unknown	['Text Classification', 'Topic Modeling']	['Sentiment Analysis', 'Relationship Extraction', 'NLP Models']	Intent-Based Search	Operational Efficiency	Yes	Unknown	Unknown	Unknown	Unknown	Unknown	Internal Data	7	10	Unknown
Enhancing Operational Efficiency with NLP: A PoC Utilizing SpaCy and ScispaCy for NER, Entity Linking, and Text Similarity at XXXXXXXX	The project undertaken by XXXXXXX is a Proof of Concept (PoC) focused on leveraging Natural Language Processing (NLP) technologies, specifically SpaCy and ScispaCy, to enhance operational efficiency. The project, which is currently in progress, aims to achieve Named Entity Recognition (NER) and Entity Linking with a custom pipeline, targeting better text similarity comparison results than existin…		2022	0	Base	2	Unknown	Utilized SpaCy and ScispaCy for NER and Entity Linking. Custom pipeline improved text similarity. Faced data inconsistencies. Project in progress, aiming for operational efficiency.	- NLP Types and Subtypes: - Text Classification - NER (Named Entity Recognition) - Entity Linking via Hearst Patterns - Text Similarity Comparison - Subtypes: DOSAGE, DNA, CELL_TYPE, CELL_LINE, RNA, PROTEIN, DISEASE, CHEMICAL, DRUG_BRAND_NAME, AGE_GROUP, INTERNAL_COMPOUND_NAME - Project Details: - Level: Proof of Concept (PoC) - Phase: In Progress - Expected Endpoint: - Leverage NER with entity l…		['English']	on premise	Unknown	Unknown	Unknown	Yes	Yes	Unknown	unknown		On Premise		PoC	In Progress	Internal - 5	['SpaCy']		Private	Internal Database	other	ner results that are on-par with scibite; no similarity comparison score should be > 100% match; tolerance for sentences that use synonymous entities; ability to find portions of a query document that are not 95% similar to a portion of a source document.	Custom Pipeline	SpaCy	Manual Evaluation, User Feedback	Nonclinical Regulatory Submission	['Text Classification', 'Entity Linking']	[]	NER and Entity Linking	Operational Efficiency	In Progress	Unknown	Unknown	TBD	Other	Inconsistent Formatting	TBD	2	Unknown	SpaCy, Prodigy
Automated Extraction of Efficacy Endpoints from Medline Abstracts Using NLP Pipelines and BERT Variants to Enhance Operational Efficiency at XXXXXXXX	"Efficacy Endpoint Extraction" project aims to automate the extraction of efficacy endpoints from Medline abstracts to enhance operational efficiency. The project is currently in the Proof of Concept (PoC) phase and is deployed on-premise. The primary data source is public Medline abstracts, and the data preparation involves removing redundant sentences and addressing special character and encodi…		2022	0	Research	Unknown	10	Automated extraction of efficacy endpoints from Medline abstracts using BERT variants improved operational efficiency. Key challenges included data quality and manual evaluation. Future iterations will enhance pre-labeling and integrate StandfordcoreNLP.	- Project Name: Standfordcorenlp - NLP Type: Information retrieval, information extraction - NLP Subtype: Efficacy endpoints - Project Level: MVP - Project Phase: In progress - Expected Endpoint: Automated extraction of efficacy endpoints from journal articles - Success Criteria: F1 score, precision, recall - Higher Business Goals: Operational efficiency - Customer Size: 10 - FTEs Involved: 1.3 -…		['English']	on premise	Unknown	Unknown	Unknown	Unknown	Unknown	Unknown	unknown		On Premise		PoC	In Progress	Other - 1.3	['R']		Public	Medline Abstracts	precision	f1 score, precision, recall	NLP Pipeline	Transformers, PyTorch	Manual Evaluation, Precision, Recall	Other	['Information Extraction', 'Relationship Extraction']	['Efficacy Endpoints']	Automated Extraction	Operational Efficiency	Unknown	Automatic Pre-Labelling	Unknown	Manual Evaluation	Redundant Sentences Removal	Special Characters, Character Encoding Issues	Free Text, Medline Abstracts	Unknown	10	Training Data Extraction, I2E, IQVIA
Optimizing Document Extraction with NLP and OCR for Operational Efficiency: A PoC by XXXXXXXX Using SpaCy, NLTK, and AWS Textract	The project titled "NLP Document Prediction" is being conducted by XXXXXXXX and is currently in the Proof of Concept (PoC) phase. The project aims to achieve highly specific extraction of relevant documents from a high data domain, with a focus on operational efficiency as a higher business goal. The success criteria for the project include sensitivity percentage and scalability. The deployment i…		2022	0	Research	Unknown	10	Key insights: 1. Project aims for specific document extraction to enhance operational efficiency. 2. Significant data cleansing needed due to OCR issues with text photographs. 3. Utilized SpaCy, NLTK, AWS Textract in an NLP pipeline. 4. Deployment on-premise, PoC phase, customer size 10. 5. Success criteria: sensitivity, scalability; evaluation pending.	- Project Overview: - NLP Type: Text classification, information retrieval, optical character recognition - Project Level: MVP - Project Phase: In progress - Expected Endpoint: Highly specific extraction of relevant documents in high data domain - Success Criteria: % sensitivity, scalability - Higher Business Goals: Operational efficiency - Customer Size: 10 - Start-End Dates: 2022 - Data Details…		['English']	on premise / AWS	Unknown	Unknown	Unknown	Unknown	Unknown	Unknown	unknown		On Premise	/	PoC	In Progress	Other	['AWS Textract', 'NLTK', 'SpaCy']		Unknown	Many File Types, Converted To Text Data	scalability	% sensitivity, scalability	NLP Pipeline	Python	TBD	Unknown	['Text Classification', 'Relationship Extraction']	[]	Specific Extraction	Operational Efficiency	Unknown	Unknown	Unknown	Unknown	Unknown	OCR Issues	Box Folder Contents	Unknown	10	Data Cleansing Required
Proof of Concept for On-Premise Natural Language to Python Code Generation at XXXXXXXX: Evaluating Accuracy in Converting English Text to Python Code	XXXXXXXXX is currently undertaking a project titled "Natural language text to Python code generation," which aims to develop a system capable of converting English text into Python code. This initiative is being deployed on-premise and through SCP, with the project currently in the Proof of Concept (PoC) phase. The primary success criterion for this project is the percentage accuracy of the gener…		2022	0	Code generation from NL	Unknown	Unknown	Focus on high accuracy in code generation. Ensure robust evaluation and stakeholder engagement. Thorough documentation is crucial for future iterations.	- NLP Type: Natural Language Generation - NLP Subtype: English to Python / English to SAS - Project Level: Proof of Concept (PoC) - Project Phase: In Progress - Expected Endpoint: Generation of Python code from text - Success Criteria: Percentage accuracy - Success Achieved: To Be Confirmed (TBC) - Start-End Dates: 2022		['English']	on premise / SCP	Unknown	Unknown	Unknown	Unknown	Unknown	Unknown	unknown		On Premise	/ scp	PoC	In Progress	Other	[]		Unknown	Unknown	accuracy	%accuracy	Unknown	Unknown	Unknown	Unknown	[]	[]	Code Generation	Unknown	Unknown	Unknown	Unknown	Unknown	Unknown	Unknown	Unknown	Unknown	Unknown	Unknown
Development of a Best-in-Class Biomedical Named Entity Recognition System Using SpaCy and BERN2 for Enterprise Deployment on Kubernetes and AWS	Project, titled "Named Entity Extraction and Linking," aims to develop a best-in-class Named Entity Recognition (NER) system for the biomedical domain. The project is currently in the production phase and is being deployed on-premise using Kubernetes (k8s) and AWS. The primary data source for this project is BERN2, and the algorithms utilized include SpaCy, Python, and Scala. The project team con…		2022	0	Base	7	Unknown	Developed a robust biomedical NER system using SpaCy and BERN2, deployed on-premise with Kubernetes and AWS, achieving high recall, precision, F1, and AUC.	- NLP Type: NER solution for biomedical domain - Project Level: Production - Project Phase: In progress - Expected Endpoint: Best-in-class NER system for biomedical domain - Success Criteria: Recall, precision, F1, AUC - Success Achieved: Yes - Higher Business Goals: Benefit multiple stakeholders as an Enterprise offering - Overall Maturity Rating: 7 - FTEs Involved: 4 - Primary Data Sources: BER…		['English']	on premise / AWS, k8s	Unknown	Yes	Unknown	Unknown	Unknown	Unknown	unknown		On Premise	/ , k8s	Production	In Progress	Internal - 4	['SpaCy']		Unknown	Bern2	precision	recall, precision, f1, auc	Unknown	Python, Scala	Unknown	Unknown	[]	[]	NER System	Enterprise Offering	Yes	Unknown	Unknown	Unknown	Unknown	Unknown	Unknown	7	Unknown	Unknown
Developing a Knowledge Graph for Drug Discovery by Extracting Relationships from PubMed Literature Using Advanced NLP Techniques at XXXXXXXX	XXXXXXXXXXXXXX "Relationship Extraction for Knowledge Graph" project aims to develop a primary source of knowledge graphs for drug discovery by extracting relationships between entities such as genes and drugs from public literature, specifically PubMed. The project is currently in progress and deployed on-premise and on Azure using Databricks. It is at the production level with a team of four in…		2022	0	Research	8	Unknown	Effective NLP techniques and hybrid deployment created a robust knowledge graph for drug discovery, overcoming data consolidation challenges and achieving strategic business goals.	- NLP Type: NER + linking, relationship extraction - Project Level: Production - Project Phase: In progress - Expected Endpoint: Primary source of Knowledge Graph for drug discovery purposes, extracting relationships between entities (genes, drugs, etc.) from public literature (e.g., PubMed) - Success Criteria: Graph downstream tasks performance, graph metrics - Success Achieved: Yes - Higher Bus…		['English']	on premise / Azure, databricks	Unknown	Yes	Unknown	Unknown	Unknown	Unknown	unknown		On Premise	/ , databricks	Production	In Progress	Internal - 4	['Scala', 'Databricks', 'Python', 'Stanford NLP']		Public	Pubmed	graph metrics	graph downstream tasks performance, graph metrics	Unknown	Unknown	Unknown	Unknown	['Relationship Extraction']	[]	Knowledge Graph	Knowledge Graph	Yes	Unknown	Unknown	Unknown	Unknown	Data Consolidation	Free-Text Publications	8	Unknown	Large Dataset
Developing a Document Question Answering System for Quality Assurance Using NLP and LLMs: A Proof of Concept by XXXXXXXX to Enhance Operational Efficiency and Minimize Type II Errors	The project, led by XXXXXXXXXX, focuses on developing a Document Question Answering system for Quality Assurance (QA) using Natural Language Processing (NLP) and Natural Language Generation (NLG) technologies. The initiative is currently at the Proof of Concept (PoC) stage and aims to create a tool that enables a Large Language Model (LLM) to factually answer questions based on specific document …		2023	1	Research	7	25	Developed a Document QA system using NLP and NLG to enhance QA efficiency. Utilized OpenAI GPT-3.5-Turbo, GPT-4, and Text-Embedding-ADA-002 with LangChain, Chroma, and Pinecone workflows. Focused on minimizing type II errors, ensuring contextual relevance, and managing API costs. Leveraged PubMed and arXiv data. Expected high value with low effort.	- Project Overview: - Type: NLP and Natural Language Generation - Subtype: Factual Question Answering with Citations via LLMs - Level: Proof of Concept (PoC) - Phase: In Progress - Expected Endpoint: A tool enabling an LLM to factually answer questions based on the content of a specific document. - Success Criteria: % of type II errors, refusal to answer without relevant context, API costs - Succ…		['English']	on premise / AWS	Unknown	Unknown	Unknown	Unknown	Unknown	Unknown	build		On Premise	/	PoC	In Progress	External - 4	['OpenAI GPT-3.5-Turbo', 'OpenAI Text-Embedding-ADA-002', 'LLM']		Public	Pubmed, Arxiv	api costs	% of type ii errors, refusal to answer without relevant context, api costs	LangChain, OpenAI, Chroma, Pinecone	GPT-3.5-Turbo, GPT-4	Unknown	Unknown	[]	['Factual Question Answering', 'Citations via LLMs']	Other	Operational Efficiency	In Progress	Unknown	Unknown	Unknown	Unknown	Unknown	Unknown	7	25	OpenAI
Enhancing Operational Efficiency with LLM-Based Text Classification and Recommender System for Scientific Publications and News Articles: A Completed AWS Cloud Deployment by XXXXXXXX	XXXXXXX "News Monitoring" project, led by XXXXXXXXX, focuses on text classification and information retrieval using large language models (LLMs). The project, deployed on AWS and completed in 2023, aims to enhance operational efficiency by developing a recommender system for scientific publications and news articles. The internal team of five full-time equivalents (FTEs) utilized public data sour…		2023	1	Research	7	Unknown	Enhanced operational efficiency via LLM-based recommender system. AWS deployment ensured scalability. Manual annotations and user metrics were key. High maturity but user engagement needs improvement.	- Project Type: Text Classification, Information Retrieval - NLP Type: Text Classification - NLP Subtype: Information Retrieval - Project Level: Production - Project Phase: Completed - Expected Endpoint: Recommender system for new scientific publications and news articles - Success Criteria: User engagement - Success Achieved: TBD - Higher Business Goals: Operational efficiency - Overall Maturity…		['English', 'Danish']	AWS	Unknown	Unknown	Unknown	Unknown	Unknown	Unknown	build		Cloud		Production	Completed	Internal - 5	['LLM']		Public	Scientific Publications, News Articles	user engagement	user engagement	Text Classification	DSPy	F1 Scores	Unknown	['Text Classification']	['Relationship Extraction']	Recommender System, Scientific Publications, News Articles	Operational Efficiency	In Progress	Unknown	Unknown	Unknown	Unknown	Unknown	Manual Annotations, User Engagement Metrics	7	Unknown	Internal
Development and Deployment of a Multitask BERT-Based Named Entity Recognition and Linking System for Monitoring Scientific Literature, Patents, Clinical Trials, and Public Discourse	XXXXXXXXXXX undertook a project titled "Named Entity Recognition and Linking," led by XXXXXXXXX, with the primary language being English and deployed on AWS. The project, which reached production level and has been completed, aimed to develop a system for monitoring scientific literature, patents, clinical trials, and public discourse. The project team consisted of three internal full-time employ…		2023	0	Base	9	Unknown	Developed a Multitask BERT-based NER and NEL system for monitoring scientific literature, patents, and clinical trials, enhancing operational efficiency.	- Information Extraction: NER, NEL - NLP Type: Information Extraction - NLP Subtype: NER, NEL - Project Level: Production - Project Phase: Completed - Expected Endpoint: NER + NEL system for monitoring scientific literature, patents, clinical trials, and public discourse - Success Criteria: Performance metrics, ease of use for downstream stakeholders - Success Achieved: Yes - Higher Business Goal…		['English']	AWS	Unknown	Unknown	Unknown	Unknown	Yes	Unknown	build		Cloud		Production	Completed	Internal - 3	['Multitask BERT']		Public	Scientific Publications, News Articles, Patents, Clinical Trials, Conferences	performance metrics	performance metrics, ease of use for downstream stakeholders	Token Classification, Vector Search, Bi-Encoder, Cross-Encoder	Hugging Face, Custom Code	F1 Scores, Accuracy	Unknown	['Information Extraction']	['Named Entity Linking']	Patents	Operational Efficiency	Yes	Unknown	Unknown	Unknown	Unknown	Unknown	PubMed, Full Text Articles, Pharma Pipeline Data, Clinical Trials, News, Conference Abstracts	9	Unknown	Internal
Development of a Multitask BERT-Based Relation Extraction System for Knowledge Graph Construction Using Public Texts at XXXXXXXX	"Relation Extraction" project aimed to develop a relation extraction system to detect relationships mentioned in public texts for knowledge graph construction. The project, deployed on AWS and completed in 2023, utilized Multitask BERT algorithms with workflows centered on sentence classification. The algorithm library included Hugging Face and custom code, evaluated primarily on accuracy. The pr…		2023	0	Research	9	Unknown	Developed a Multitask BERT-based relation extraction system for knowledge graph construction. Achieved operational efficiency with high accuracy. Deployed on AWS.	- Information Extraction Type: Relation Extraction (RE) - NLP Type: Information Extraction - NLP Subtype: Relation Extraction (RE) - Project Level: Production - Project Phase: Completed - Expected Endpoint: Relation extraction system to detect relations mentioned in public texts, used for knowledge graph construction - Success Criteria: Performance metrics, ease of use for downstream stakeholders…		['English']	AWS	Unknown	Unknown	Unknown	Unknown	Yes	Unknown	build		Cloud		Production	Completed	Internal - 3	['Multitask BERT']		Public	Scientific Publications, News Articles, Patents, Clinical Trials, Conferences	performance metrics	performance metrics, ease of use for downstream stakeholders	Sentence Classification	Hugging Face, Custom Code	Accuracy	Unknown	['Information Extraction']	['Relationship Extraction']	Knowledge Graph, Relation Extraction	Operational Efficiency	Yes	Unknown	Unknown	Unknown	Unknown	Unknown	PubMed, Full Text Articles, Pharma Pipeline Data, Clinical Trials, News, Conference Abstracts	9	Unknown	Internal
Development of an Abstractive Summarization System for Scientific Publications, Patents, and News Articles Using Large Language Models on AWS/Azure Cloud Platforms	XXXXXXXXXXXXX is currently undertaking a project titled "News Summarization," led by XXXXXXXXX. The project, which is in the Proof of Concept (PoC) phase and expected to run throughout 2023, aims to develop an abstractive summarization system using large language models (LLMs). The deployment is planned on cloud platforms such as AWS or Azure. The primary data sources include scientific publicati…		2023	0	Research	5	Unknown	Develop abstractive summarization system using LLMs on AWS/Azure. Focus on scientific publications, patents, news articles. Evaluate with BERTScore, ROUGE.	- NLP Type: Abstractive summarization - NLP Subtype: Information retrieval - Project Level: MVP - Project Phase: In progress - Expected Endpoint: Scientific publications, patents, news articles - Success Criteria: Performance metrics, ease of use for downstream stakeholders - Overall Maturity Rating: 5 - FTEs Involved: 3 - Training Set / Source: Internal - Primary Data Sources: Scientific publica…		['English']	AWS/Azure	Unknown	Unknown	Unknown	Unknown	Unknown	Unknown	build		Cloud	/	PoC	In Progress	Internal - 3	['LLM']		Public	Scientific Publications, News Articles, Patents, Clinical Trials, Conferences	performance metrics	performance metrics, ease of use for downstream stakeholders	Summarization	Other	BERTScore, ROUGE	Unknown	['Abstractive Summarization', 'Summarization']	['Relationship Extraction']	Scientific Publications, Patents, News Articles	Unknown	In Progress	Unknown	Unknown	Unknown	Unknown	Unknown	Patents	5	Unknown	Internal
Development of a FAIR-Compliant Knowledge Graph Integrating Scientific Literature, Patents, and Clinical Trials Using Graph Database Algorithms on AWS	XXXXXXXXXXX is currently undertaking a project titled "Knowledge Graph," led by XXXXXXXXX. The project is deployed on AWS and is at the Proof of Concept (PoC) level, currently in progress. The primary objective is to create a knowledge graph that aligns external and internal ontologies, integrating mentions across scientific literature, patents, clinical trials, and public discourse. The project …		2023	0	Research	7	Unknown	FAIR data principles achieved. Graph database and NLP effective for complex data integration. Internal build successful. Continued focus on data interoperability.	- Information Extraction Project - NLP Type: Information Extraction - Project Level: MVP - Project Phase: In progress - Expected Endpoint: Knowledge graph aligning external and internal ontologies, integrating mentions across scientific literature, patents, clinical trials, and public discourse - Success Achieved: Yes - Higher Business Goals: FAIR data - Overall Maturity Rating: 7 - FTEs Involved…		['English']	AWS	Unknown	Unknown	Unknown	Unknown	Unknown	Unknown	build		Cloud		PoC	In Progress	Internal - 2	['Graph Database']		Public	Scientific Publications, News Articles, Patents, Clinical Trials, Conferences	unknown	unknown	Unknown	Unknown	Unknown	Unknown	['Information Extraction']	[]	Knowledge Graph, Patents	FAIR Data	Yes	Unknown	Unknown	Unknown	Unknown	Unknown	PubMed, Full Text Articles, Pharma Pipeline Data, Clinical Trials, News, Conference Abstracts	7	Unknown	Internal
Development of a Multilingual LLM for Patent QA and Writing Support Using 7B LLaMA Model: A Proof of Concept by XXXXXXXX	XXXXXXXXXXX is currently undertaking a project titled "LLM pre-trained on patents," led by XXXXXXXXXX. The project aims to develop a large language model (LLM) capable of understanding patents for tasks such as question answering (QA), retrieval-augmented generation (RAG), and writing support. The LLM is being trained on patents in English, Japanese, and Chinese, using the 7B LLaMA base model. Th…		2024	1	Research	3	Unknown	Development of a multilingual LLM for patent QA and writing support using the 7B LLaMA model aims to enhance operational efficiency. Key methodologies include training on patents in English, Japanese, and Chinese, with on-premise deployment. Challenges include unspecified algorithm evaluation and data preparation. Success criteria are based on LLM benchmarks and user evaluations. The project invo…	- NLP Type: Generative AI - NLP Subtype: QA, writing, summarization - Project Level: PoC (Proof of Concept) - Project Phase: In progress - Expected Endpoint: LLM capable of understanding patents for QA, RAG, writing support - Success Criteria: LLM benchmarks, user evaluation - Success Achieved: TBD - Higher Business Goals: Operational efficiency - Overall Maturity Rating: 3 - FTEs Involved: 2 - T…		['English', 'Japanese', 'Chinese']	on premise	Unknown	Unknown	Unknown	Unknown	Unknown	Unknown	unknown		On Premise		PoC	In Progress	Other - 2	['7B LLaMA Base Model']		Public	Patents	benchmarks	llm benchmarks, user evaluation	Unknown	TBD	Unknown	Unknown	['Generative AI']	['QA', 'Writing', 'Summarization']	Patents, LLM Capabilities	Operational Efficiency	In Progress	Unknown	Unknown	Unknown	Unknown	Unknown	Patents	3	Unknown	Internal
Development of a Generative AI Chatbot Interface for Enhanced Information Retrieval Using Retrieval-Augmented Generation (RAG) from Scientific Publications and Computational Biology Databases at XXXXXXXX	"Agentic RAG" project is a Proof of Concept (PoC) initiative currently in progress. The project employs Generative AI, specifically Retrieval-Augmented Generation (RAG), to develop a chatbot interface that interacts with external text data such as literature, patents, and computational biology resources. The deployment is both on-premise and cloud-based. The primary data sources include scientifi…		2024	1	Research	4	Unknown	Generative AI chatbot using RAG for faster info retrieval. LLMs, custom code, AutoGen. Data: publications, patents, internal databases. PoC phase, maturity rating 4.	- Project Type: Generative AI - NLP Type: Generative AI - NLP Subtype: RAG (Retrieval-Augmented Generation) - Project Level: Proof of Concept (PoC) - Project Phase: In progress - Expected Endpoint: Chatbot interface using agents and graph RAG to interact with external text data (literature, patents, etc.) and computational biology resources - Success Criteria: Benchmarks, user feedback - Success …		['English']	On premise + Cloud based	Unknown	Unknown	Unknown	Unknown	Unknown	Unknown	unknown		On Premise	+ based	PoC	In Progress	Other - 5	['LLM']		Public	Scientific Publications, News Articles, Patents, Clinical Trials, Conferences, Comp. Bio Databases	user feedback	benchmarks, user feedback	Unknown	Custom Code, AutoGen	Unknown	Unknown	['Generative AI']	['RAG']	Patents, Chatbot Interface	Information Retrieval	In Progress	Unknown	Unknown	Unknown	Unknown	Unknown	Knowledge Graphs, Commercial APIs, Internal Databases	4	Unknown	Internal
Development of an Enhanced Biomedical BERT Model for Long Contexts Using ALiBi Positional Encoding: A Proof of Concept for Improved Text Embeddings, NER, and Relationship Extraction	XXXXXXXXX is currently working on a project titled "Biomedical long context BERT model," led by XXXXXXXX. The project is being developed on-premise and is in the Proof of Concept (PoC) phase. The primary goal is to create a BERT model capable of supporting longer contexts (up to 8k tokens) using ALiBi positional encoding. This model aims to improve performance and accuracy in downstream tasks suc…		2024	0	Base	1	Unknown	Developing a BERT model for longer contexts (8k tokens) using ALiBi encoding. Focus on text embeddings, NER, and relationship extraction. In progress.	- Project Type: Masked Language Model - NLP Type: Masked language model - NLP Subtype: Encoder only architecture - Project Level: Proof of Concept (PoC) - Project Phase: In progress - Expected Endpoint: BERT model supporting longer contexts (8k tokens) using ALiBi positional encoding - Use Cases: Text embeddings, Named Entity Recognition (NER), and relation extraction - Success Criteria: Benchmar…		['English']	on premise	Unknown	Unknown	Unknown	Unknown	Unknown	Unknown	unknown		On Premise		PoC	In Progress	Other - 2	['Masked Language Model']		Public	Scientific Articles, Patents	benchmarks	benchmarks	Pre-Training	MosaicML Composer	Accuracy	Unknown	[]	['Relationship Extraction']	BERT Model	Performance Improvement	In Progress	Unknown	Unknown	Unknown	Unknown	Unknown	PubMed, Patents, PMC Commercial Use	1	Unknown	Internal
Generating Plain Language Summaries (PLS) for Scientific Publications	Plain Language Summaries (PLS) of clinical studies present clinical results in terms that are easy to understand, making research findings accessible for patients, physicians, and the general public. Currently, PLS are written manually by medical writers, which can be a costly and time-consuming process. Using natural language processing (NLP) techniques to assist medical writers could help speed…		2024	1	Clinical	9	30-50	Developing a GenAI solution supporting the creation of plain language summaries of scientifc articles.	"- Project Type: Generative AI - NLP Type: Gnerative AI - NLP Subtype: Text Summarization - Project Level: Production - Project Phase: Completed - Expected Endpoint: Generation of lay language summaries suiting different audiences using an LLM-based approach - Use Cases: Text Summarization - Success Criteria: Reduce time to create an lay summary - Success Achieved: Yes - Higher Business Goals: Im…
Job Advertisement AI Assistant	An organization creates and publishes a lot of job advertisement requisitions every year, with significant manual efformt from the Talent Acquisition department. This is a time-consuming process, requiring a high level of consistency and alignment with specific and detailed talent attraction stories to attract the most suitable candidates. Aim of this project is to streamline this process by leve…		2023	1	GS&A	8	100+	Developing a GenAI solution supporting the creation of job postings using an LLM-based approach	"- Project Type: Generative AI - NLP Type: Gnerative AI - NLP Subtype: Text Writing - Project Level: Production - Project Phase: Completed - Expected Endpoint: Generation of job postings using an LLM-based approach - Use Cases: Text Creation - Success Criteria: Reduce time to create job postings - Success Achieved: Yes - Higher Business Goals: Improve operational efficiency - Overall Maturity Rat…
LLMs Create Data Models	Pistoia Alliance often creates data standards. This is a typical pre-competitive project. But it is extremely inefficient. Using LLMs to create data models as summaries of multiple low-quality notes accelerates the creation of a consensus standard.		2025	1	Research	3	10	LLM to create data models as summaries of diverse, poorly structured notes.
[truncated: 1 more columns]

## Sheet: Work
Project title/short description	Project Phase	Overall success flag	Success achieved	Overall Maturity Rating	Customer size	FTEs involved	Endpoint reached [1..10]	Algorithms used	Data- learning	Data-next time	Taxonomies used	Was this a succcess for devs	Was this a success for business	Was there proper dev support	Was there proper bus support	Other applications of the technology?	Would the BO do it again	Project team	Value to effort ratio		Ratio
Automated Batch Record Review	not started			1	100000	0	1	N/A	N/A	N/A	N/A	no	no	0	0	0	0	N/A	N/A
KiaKia	in progress			5	1000	3	5	We used SpaCY, SciBite, LLMs, Linguamatics, ELMO	Training set is from previous human completed work and may include wrongly categorized records; imbalance of the data classes used in training models; difficulty with identifying training set in a prospective setting	If we had time, we would spend it cleaning up the human responses before deploying to the model; Also, try to identify training data using newer approaches such as synthetically generating them using generative AI models; normalization of libraries before deployment for model training	MedDRA; UMLS	Project is not completed yet	Project is not completed yet	1	1	Project is not completed yet	1	1 Business PO, 1 NLP Expert, 1 Business SME, 1 Squad Lead, Others as needed	n/a project incomplete
Interactive Text Mining Suite (ITMS)	completed	1	yes	8	10	1		shiny, R	formats of data sources can be challenging, character set issues	n/a	n/a	yes	yes	0	0	0	1	1 NLP expert	high (4 value /1 effort)		H
Preclinical toxicology report mining with HAWK	completed	1	yes	9	20	2		Biobert	Spot check data quality with domain expert		No	yes	yes	1	1	1	1	1 business PO, 1 NLP expert	med (3 value/2 effort)		M
MedMon	in progress	1		9	10	0.1	9	NER and classification algorithms	End-user evaluation	There are external data providers that provide better data quality. However, they are also more expensive, particularly when considering additional social media sources.	Disease, symptom	yes	yes	1	1	1	1	1 Business PO, the vendor takes care of the technical side	unknown
IQVIA NLP (Linguamatics I2E)	in progress	1		10	15	0.25		IQVIA NLP algorithms	Different sets of users need different granularity in the underlying structure of the data.	Creating a data lake with uniform standards, as done by NovoNordisk.	Multiple (EMTREE, MeSH, human phenotype, NCBI Gene, etc)	yes	yes	1	1	1	1	1 Business PO, 1 NLP Expert	unknown
NLP Engine	in progress	1		9	50	3.5	8	See here: https://dna_ds.pages.roche.com/nlp_engine/	Data augmentation can help with data sparsity problem.	Depend on individual use case	N/A	yes	yes	1	1	1	1	1 PM, 3 NLP Data Scientist	med (3 value/2 effort)		M
ChatBot for Technical Transfer	in progress			2	100	4	2	LLaMA, Vicuna, obj2vec	The data needs to be cleaned and transformed heavily as well as vectorized		no determined yet	Only 15% done at the moment, hard to tell	Only 15% done at the moment, hard to tell	0	1	0	Only 15% done at the moment, hard to tell	1 Program Manager, 1 Product Owner, 3 Data Scientists	n/a project incomplete
Incident categorization	completed	1	yes	5	1000	5		Latent Dirichlet Allocation algorithm	The data should have granularity enough to focus on a specific service	Standardize language	No	yes	no	0	0	1	0	2 NLP Experts, 1-3 Subject matter expert of the service	high (5 value/1 effort)		H
Finding criticality misclassification	completed	1	yes	7	50	4		XGBoost	Text data is complex		No	yes	yes	1	1	1	1	3 Data scientists, one product owner (Quality expert)	med (4 value/2 effort)		M
Identify Clinical study names	in progress	1		9	100	1	4	BERT	see above	there are no options to improve the data.	see above	in preparation	Very likely	1	1	1	1	1 BO, 1 NLP expert	high (10 value/1 effort)		H
“Fix forever”	in progress	1		6	20	4	7	BERTopic, NLTK, Pandas	quality of writing can effect the results.	starting from semi-supervised or guided topic modeling instead of unsupervised.	No Taxonomy used so far.	yes	Still on going and too early to answer.	1	1	1	1	3 Business, 1 NLP expert, 2 Data Scientists	unknown
RCA solution	paused	1		9	100	5	9	AWS Comprehend services, NLTK, Pandas, Scikit-learn, SentenceTrasnformers	Quality of writing matters, Translation matters, human expectation can be different		No taxonomy used.	yes	Maybe I am not a right person to answer this question.	1	1	1	1	1 Data Scientists, 1 NLP expert, 3 Business, 1 Data Engineer, 1 Tableau developer	unknown
Quality Analytics	in progress	1		8	250	20	8	BERTopic, AWS Comprehend services, NLTK, Pandas	Quality of writing matters, Translation matters, human expectation can be different	Extract more and more prior knowledge from the SMEs and go with semi-supervised approaches if we can't do fully supervised.	No taxonomy is used.	yes	Maybe I am not a right person to answer this question.	1	1	1	1	2 Data Scientists, 1 NLP expert, 8 Business, 1 Data Engineer	unknown
Patent annotation and categorization	in progress	1		8	18537	0	2	BioBERT	Natural language including partially formalized language is suitable for this approach	At first "a first time" would be appreciated. There are many related text repositories which could benefit from this approach (including reuse of infrastructure).	No taxonomies were intended so far for the ad hoc patent categorization tasks. However, there are a number of RTS taxonomies that are applicable upon request of the business owner (details are currently being collected)	Yes, for the pilot	In progress	1	1	1	1	1 BO, 2 NLP (content, algorithm), + MLOPs support	high (5 value/1 effort)		H
Risk extraction	production implementation being finalized	1		7	30	1.5	9	SpaCy etc.	introduce agreed terminologies/standardization		non	yes	yes	1	1	investigation ongoing	1	1 Business PO, 2 NLP Experts	unknown
ClusterizeIT	completed	1	In progress. MVP to be scalable	2	50	1		Sentiment Analysis with Transformers from Hugging Face (sentiment_en_default), BERT & TF-IDF for vectorization, UMAP for dimensionality reduction, HDBSCAN and DBSCAN for clustering	Experimentation is good for a technology and innovation-driven approach. Better context of specific business use cases would help to develop the solution. Evaluation of different user journeys (e.g. technical vs non-technical users)	Rather than an IT-driven solution, it should have more clarity on the business case	No	To be confirmed	IT experiment	1	1	0	1	0.25 Data scientist, 0.5 Developer	N/A
	in progress						3
	in progress	1		7	25	3	7	ML Classifiers	EDA		no	partially	yes	0			1	small team of 2 experts	med		M
	in progress	1		?	20	1	?	spacy, Linguamatics I2E, reg exp		?	no	not yet (these criteria do not apply for ongoing projects?)	yes	0	1		1	best place to ask this?	unknown
	in progress	1		7	1000	2	8					yes	not rolled out yet	1	1		1	KM (business), RGITSC (IT)	med (3 value/2 effort)		M
	in progress	1		9	20000	2	8	SciByte	NER is mature. only challenges are hard to access/read / process source documents	more robust processinng pipeline & connectors, buy commecial	dozens of commercial, in house, open source an other taxonomies and lists used	yes	yes	1	1		1	internal it	high (5 value/1 effort)		H
Extraction of key execution parameters	Ended	0	Not successful			1	4	SpaCy	The irregularity of written text requires a powerful semi-supervised approach	Need clear definition of what should be extracted (Target Model)		no	no	0			0	external	high (5 value/1 effort)		H
	Completed	0		4	200	5	5	BioBERT			NCBI / uniProt gene dictionaries	no	no	1	1		1	QuantiPHI	unknown
	in progress	0		2	200	3	1	BioBERT (for unstructured assay data)		Rebuild and also create decision capture tool (knowledge platform) to better provide context on sample data	many commercial / open source plus extensive internal developed ont	yes	no	0	1		1	internal (will bring in EPAM for next build)	med (2 value/1 effort)		M
	in progress	1		3	500	7	2	TBD	Difficult to ID a unique reaction and remove duplicates	Need improved QC, labeling, and semantic extraction from free text fields	Open Reaction DB	not yet	yes	0	1		1	internal / external (EPAM)	high (5 value/1 effort)		H
Target Search for Legacy Documents	operations	1	Yes	9	50	2	Not sure what this means	SciBite	Not all APIs deliver the same content as per the native data sets - need to verify with vendor what their API provides .	still learning the lessons learned	Ontologies & VOCabs from SciBite plus other public domain and internal ontologies	yes	yes	1	1	Still in development so yet to see how it can be extended to other uses	1	Internal with consultant	TBD
Patient Sentiment Discovery	operations	1	TBD	2	50	3		SciBite				yes	We are still evaluating	1	1		1	Internal with consultant	TBD
"Disease Portal": Search for Documents for Strategy and Competitive Intel	operations	1	TBD	3	50	2		SciBite	Not all APIs deliver the same content as per the native data sets - need to verify with vendor what their API provides .			yes	yes	1	1		1	Internal with consultant	TBD
	in progress	0		6	18000	4	5	TextRank, word2vec, BERT	data cleaning upfront (e.g. by adding a waterfall-style cleaning gate before going into agile development of the solution)	automatic authorship detection, start from one source system and expand systematically	ESCO, custom skills taxonomy	no	no	1	0		1	KM (business), RGITSC (IT)	med (2 value/1 effort)		M
	in progress	1		8	500	2	8	BERT, word2vec, HDBSCAN, UMAP, Transformers, TextRank, deep learning, graph embedding	exploratory data analysis, transformer-based keyprase extraction, phrase classification	improved sampling before ML, increase the rate of automatically detected concepts	custom deviations taxonomy	yes	yes	1	1		1	KM (business), RGITSC (IT)	med (3 value/2 effort)		M
	In Progress	1	Yes, we tapped into significant reduction of manual work for classification, analysis, and synthesis	8	~300-500	5 SME's	8	Spacy, NLTK, SparkNLP, Pandas,	NA	NA	NA	Yes	Yes	1	1	NA		Internal	TBD
	Completed	1	The development and utilization of the AI solution to garner insights on patients’ and caregivers’ experiences with different cancer diseases and treatments has the potential to effectively inform PFDD strategies. Immediate next steps include incorporating learnings from this research to additional tumor types, therapeutic areas and data sources.	8	~200 Users	5 SME's	8	Spacy, NLTK, SparkNLP, Pandas, BART, RoBERTA, BERT, etc.	NA	NA	NA	Yes	Yes	1	1	NA		Internal	TBD
		1	Reduction of time needed to manually analyze the textual inquiries by 30% to 50% which accounts to significant cost savings on labour (measured in terms of approx. few hundred thousand euro per annum), Near-real time access to insights with turn around time less than 24 hours	9	~200 Users	7 SME's	8	Spacy, NLTK, PKE, Topic Rank, SparkNLP	NA	NA	NA	Yes	Yes	1	1	NA		Internal	TBD
	In Progress	0	Not as relevant today	5	~2k+ users expected	2 SMEs
	Completed	1	Yes	10	N.A.	7	10	different transformers based embeddings, e.g. PubMedBIRT
	Completed	1	Yes	9	200+	6	9
	Completed	1	Yes	9	200+	6	9
	In Progress	1	Yes	7		5
	Completed	1	Yes	8	100+	2		PubMedBERT
	Completed	1	yes	7	110+	3	10	Keyword extractor	NA		NA	yes	yes	1	1	1	1	1 Business, 1 NLP Expert inhouse, Vendor AI expert team	high (Saved 1 FTE)		H
Identification of MSL insights	In Progress	0	not yet	6	400	10	3	Topic detection: Lingo4G	standardization at time of data creation would be helpful; splitting of notes into separate, targeted fields at time of data creation would be helpful	potentially simplify & harmonize language using LLMs prior to analysis?	MeSH, RxNorm, custom synonyms	Partially	No	1	1	1	0	Internal	Low (High effort / medium benefit)		L
Identification of emerging trends in MSL discussion notes	in progress	1	yes	8	400	10	3	Topic detection: Lingo4G	data itself was clean and high quality; the diversity of topics was high so that no significant trends could be identified	not sure if (semi-)manual tagging would help to get more abstraction; in the end it is about high enough volumes that are required for statistical trend identification in text data.	MeSH, RxNorm, custom synonyms	yes	yes	1	1	1	1	Internal	Low (Medium effort / low benefit)		L
MedInfo topic detection & trend	in progress	1	yes	8	10	10	3	Topic detection: Lingo4G	data quality was volatile due to different language skills in different countries; due to restrictions in the vendor system, the request text field was used to store additional information, creating more demand on data cleaning.	data should be captured in a more standardized way; the request text should not be used to store any other additional data.	MeSH, RxNorm, custom synonyms	yes	yes	1	1	1	1	Internal	Med (Medium effort / medium benefit)		M
Voice of the customer for strategic communication	in progress	1	yes	6	15	10	4	Topic detection: Lingo4G; Phi coefficient, Fisher z transformation	very brief text response from HCPs but low complexity and high level of standardization due to the intended reflection of the wording from the sales rep.	no change	MeSH, RxNorm, custom synonyms	N/A	yes	0	1	1	1	Internal	Med (Medium effort / medium benefit)		M
Listen to patients	completed	1	yes	3	5	5	4					N/A	yes, identified insights about the authentic voice of the patient	0	1	1	1	External	Med (Medium effort / medium benefit)		M
Similarity search	in progress	1	yes	7	400	10	8	Apache Solr MLT	data quality was volatile due to different language skills in different countries; due to restrictions in the vendor system, the request text field was used to store additional information, creating more demand on data cleaning.	data should be captured in a more standardized way; the request text should not be used to store any other additional data.	none	yes	yes	1	1	1	1	Internal	High (Low effort /High benefit)		H
Extractive auto-summarization	in progress	0	no	3	400	10	2	Extractive summarization	the more standardized the input, the better it can be summarized via statistical methods	would not change the data but rather the algorithms	none	No	no	1	1	1	0	Internal	Med (High effort /high potential)		M
Enhanced text searches across data sources	in progress	1	yes	7	10	5	2					In preparation	In progress	1	1	1	TBD	External	Med (Medium effort / medium benefit)		M
	in progress		TBD	2	TBD	5	SpaCy 3.4.3, ScispaCy 0.5.1, spaCy's small English model (en_core_web_sm), en_core_sci_scibert, en_ner_bionlp13cg_md, en_ner_bc5cdr_md, en_ner_jnlpba_md	SpaCy 3.4.3, ScispaCy 0.5.1			custom synonyms, hypernym and hyponym extraction via Hearst patterns	TBD	TBD	TBD	1	1		Internal	High (Low effort /High benefit)
Efficacy Endpoint Extraction	in progress		TBC	?	10	1.3		BERT (+ BERT variants) and i2e in parallel		improved automatic pre-labelling
NLP Document Prediction	in progress		TBC	?	10	TBD		SpaCy, NLTK, AWS Textract
Natural language text to Python code generation	in progress		TBC	?
Named Entity Extraction and Linking	in progress	1	YES	7		4		BERN2 / Spacy / Python					yes					internal
Relationship extraction for Knowledge Graph	in progress	1	YES	8		4		Python, scala, databricks, stanford nlp					yes					internal
Document Question Answering for QA	In Progress	1	TBD	7	25	4		Open AI text-embedding-ada-002; Open AI gpt-3.5-turbo or gpt-4; Considering use of open source LLMs					We have only done an initial test where a QA person was validating information in a Study that was cited from publicly available PubMed articles. At the same time, a user was leveraging an LLM to use question answering prompts to validate the same info as the QA person. The QA person took about 10 minutes to validate each fact in a fairly dense sentence, while the person using the LLM was done in…					2 data scientists; 2 external partners; 2 business representatives	High (Low effort / High benefit)		H
News monitoring	in progress		TBD	5		5		TBD
Named Entity Recognition and Linking	in progress	1	TBD	7		3		Multitask BERT
Relation Extraction	in progress	1	TBD	7		3		Multitask BERT
News summarization	in progress		TBD	5		3		LLMs
Knowledge Graph	in progress			?

## Sheet: Sheet2
	Overall success flag	Was there proper dev support	Was there proper bus support	Other applications of the technology?	Would the BO do it again
Overall success flag	1
Was there proper dev support	-0.157378	1
Was there proper bus support	-0.105263	0.668856	1
Other applications of the technology?	-0.105263	0.255739	0.447368	1
Would the BO do it again	0.794719	0.148522	0.331133	-0.132453	1

## Sheet: Sheet3
	Overall success flag	Was there proper dev support	Was there proper bus support	Other applications of the technology?	Would the BO do it again
Overall success flag	1
Was there proper dev support	0.1038	1
Was there proper bus support	0.172212	0.419079	1
Other applications of the technology?	-0.1	0.516398	0.507093	1
Would the BO do it again	0.551442	0.293486	0.435484	0.156098	1

## Sheet: Sheet1
Project title/short description	Overall success flag	Was there proper dev support	Was there proper bus support	Other applications of the technology?	Would the BO do it again
Automated Batch Record Review		0	0	0	0
KiaKia		1	1		1
Interactive Text Mining Suite (ITMS)	1	0	0	0	1
Preclinical toxicology report mining with HAWK	1	1	1	1	1
MedMon	1	1	1	1	1
IQVIA NLP (Linguamatics I2E)	1	1	1	1	1
NLP Engine	1	1	1	1	1
ChatBot for Technical Transfer		0	1	0
Incident categorization	1	0	0	1	0
Finding criticality misclassification	1	1	1	1	1
Identify Clinical study names	1	1	1	1	1
“Fix forever”	1	1	1	1	1
RCA solution	1	1	1	1	1
Quality Analytics	1	1	1	1	1
Patent annotation and categorization	1	1	1	1	1
Risk extraction	1	1	1		1
ClusterizeIT	1	1	1	0	1
	1	0			1
	1	0	1		1
	1	1	1		1
	1	1	1		1
Extraction of key execution parameters	0	0			0
	0	1	1		1
	0	0	1		1
	1	0	1		1
Target Search for Legacy Documents	1	1	1		1
Patient Sentiment Discovery	1	1	1		1
"Disease Portal": Search for Documents for Strategy and Competitive Intel	1	1	1		1
	0	1	0		1
	1	1	1		1
	1	1	1
	1	1	1
	1	1	1
	1	1	1	1	1
Identification of MSL insights	0	1	1	1	0
Identification of emerging trends in MSL discussion notes	1	1	1	1	1
MedInfo topic detection & trend	1	1	1	1	1
Voice of the customer for strategic communication	1	0	1	1	1
Listen to patients	1	0	1	1	1
Similarity search	1	1	1	1	1
Extractive auto-summarization	0	1	1	1	0
Enhanced text searches across data sources	1	1	1	1

## Sheet: Counts
Real counts					Expected counts			Chi-square
								Components			Value of statistic			Critical value for alpha = 0.05 and df = 1 is 3.84
	Dev support				Dev support
	Yes	No			Yes	No
Success	26	7		Success	25.3846	7.61538		0.0149184	0.049728		0.420202
Failure	4	2		Failure	4.61538	1.38462		0.0820513	0.273504
	Biz support				Biz support
	Yes	No			Yes	No
Success	30	2		Success	29.4054	2.59459		0.0120231	0.136261		1.0973
Failure	4	1		Failure	4.59459	0.405405		0.0769475	0.872072
	Other uses				Other uses
	Yes	No			Yes	No
Success	17	4		Success	17.3478	3.65217		0.00697396	0.0331263		0.461153
Failure	2	0		Failure	1.65217	0.347826		0.0732265	0.347826
	Do again?				Do again?
	Yes	No			Yes	No
Success	26	0		Success	23.5625	2.4375		0.252155	2.4375		14.3448		<--	Could be significant, BUT need more counts (ideally, no less than 5 in each cell)
Failure	3	3		Failure	5.4375	0.5625		1.09267	10.5625

## Sheet: Suc_Old
Company	Project title/short description	Owner or POC	Start-end dates (year)	Language	NLP Type	NLP subtype	Deployment type	Project Level	Project Phase	Expected Endpoint	Success criteria	Success achieved	Higher Business Goals	Overall Maturity Rating	Customer size	FTEs involved	Training set / source	Primary Data Sources	Endpoint reached [1..10]	Algorithms used	Algorithm - workflows	Algorithm - library / version	Algorithm evaluation	Algorithm - learning	Algorithm - next time	Data - description	Data Size	Data-issues	Data-preparation	Data-evaluation	Data- learning	Data-next time	Taxonomies used	Was this a succcess for devs	Was this a success for business	Was there proper dev support	Was there proper bus support	Other applications of the technology?	Would the BO do it again	Project team	Value to effort ratio	Non-NLP approach effort	Build vs buy recommendation	Additional relevant information
Roche	Interactive Text Mining Suite (ITMS)	Roman Saiz	07/2021-10/2021	English	Frequency Analysis, Sentiment Analysis, Clustering, Topic Modeling	unstructured data, no limitations regarding content	web server on premise	Production	completed	No code, intuitive, self service tool for exploratory text mining	Tool usage	yes	Enhancing Self Service capabilities in mining text	8	>10 active sessions per month	1	n/a	unstructured data collected by functions e.g. survey comments, log files, etc.		shiny, R	interactive user interface	wordcloud 2.6, quanteda 2.1.2, tm 0.7-7, topicmodels 0.2-11, NbClust 3.0, textstem 0.1.4, cluster 2.1.0,	by subject matter expert	n/a	n/a	log files, comments from surveys	< 5000 records (lower MB range)		standard text pre-processing (stop word removal, stemming, lemmatization, cleansing)	human evaluation	formats of data sources can be challenging, character set issues	n/a	n/a	yes	yes	no	no	no	yes	1 NLP expert	high (4 value /1 effort)	No.	build
Roche	Preclinical toxicology report mining with HAWK	Roman Saiz	07/2020-07/2021	English	Named Entity Recognition; Relationship Extraction	Compound/drug names, treatment groups/doses, test article related adverse events	web server cloud-based	Production	completed	SEND-compliant output of test article related major findings from around 1000 Toxicology reports were successfully mined and made available for predictive safety modeling	Time saving in annotation and SEND-compliant test article related major findings extraction	yes	Structured output and knowledge mining from our past Toxicology reports is essential for predictive safety modeling and translational research	9	20	2	semi-supervised techniques	Internal toxicology reports		Biobert	Custom pipelines	n.a.	Manual	n.a.	No change	Internal toxicology reports	10 GB		Abbyy conversion	Human evaluation a subset of the data	Spot check data quality with domain expert		No	yes	yes	yes	yes	yes	yes	1 business PO, 1 NLP expert	med (3 value/2 effort)	More costly	build
Roche	Finding criticality misclassification	Roman Saiz	11/2021-05/2022	English	ML classification	Wordclouds, entity recognition	Local before, plans to put into production	Pilot	completed	A high performing ML classifier that detects critical findings correctly	ML metrics	yes	Reduce time to detect critical findings	7	50	4	70/30	Quality data		XGBoost	None	I don't remember	Via test set and manual	It worked well. Oversampling techniques helped.	Same	Quality	I don't know	Text data is complex per se. Low amount of data.	Preprocessing, tokenization, vectorizatoin	Human evaluation	Text data is complex		No	yes	yes	yes	yes	I guess similar technologies are used all the time	yes	3 Data scientists, one product owner (Quality expert)	med (4 value/2 effort)	No	build
Merck KGaA			2020-2022	English	Natural Language Understanding, Multi Label Text Classification, Named Entity Recognition	Auto Tagging text into multi level hierarchies, Named Entities like Studies, Congress, Product, Medical Condition, etc.	On premise + Cloud based	Production	In Progress	To convert increasing volume of free-text records into real-time Insights, we developed and implemented MInE, an in-house analytics hub leveraging AI and NLP to automate and augment different elements of the Medical Insights generation process. MInE enables Merck Healthcare with faster decision-making and sharper, patient-focused execution.	TBD	Yes, we tapped into significant reduction of manual work for classification, analysis, and synthesis	With scientific expertise and multiple touchpoints with HCPs and patients, the Medical function is uniquely positioned to uncover Insights, bringing a deep understanding of the main challenges and needs of our customers. These Insights inform Healthcare development and commercialization strategies and ensure we focus on high-impact activities that translate into improved patient care.	8	~300-500	5	Semi supervised approach	Internal Database	8	Spacy, NLTK, SparkNLP, Pandas,	TBD	TBD	Manual evaluation via test set	TBD	TBD	Medical insights received as interaction with HCP's / KOL's	~10GB	NA	NA	NA	NA	NA	NA	Yes	Yes	Yes	Yes	NA		Internal	TBD	Manual efforts	Build
Merck KGaA			2020-2021	Multilingual	Natural Language Understanding, Key Phrase Extraction, Named Entity Recognition	Weak Supervisions, Key Phrase Extraction, Named entities like indications, products, side effects, lab tests, etc.	On premise + Cloud based	Production		An approach using NLP & Text Analytics to generate valuable insights from unstructured medical information inquiries. The system automatically extracts key phrases, medical terms, themes, sentiments as well as leverages unsupervised statistical modeling for two-level categorization of inquiries. Results of NLP when analyzed with the aid of visual analytics tool highlighted non-obvious insights in…	TBD	Reduction of time needed to manually analyze the textual inquiries by 30% to 50% which accounts to significant cost savings on labour (measured in terms of approx. few hundred thousand euro per annum), Near-real time access to insights with turn around time less than 24 hours	One of the key areas of our exploration is the Medical Information function within our organization. We receive a significant amount of medical information inquires in the form of unstructured data through multiple communication channels. The current system of gathering insights takes significant time and effort	9	~200 Users	7	Semi supervised approach	Internal Database	8	Spacy, NLTK, PKE, Topic Rank, SparkNLP	TBD	TBD	Manual evaluation via test set	TBD	TBD	medical information inquires in the form of unstructured data through multiple communication channels	~10GB	NA	NA	NA	NA	NA	NA	Yes	Yes	Yes	Yes	NA		Internal	TBD	Reduction of time needed to manually analyze the textual inquiries by 30% to 50%	Build
Bayer			2021-2022	English	Text Classification, text data augmentation		Cloud (AWS)	Production	Completed	Automatic mapping of medical events to standardized codes	Accuracy	Yes	increase efficiency and reduce costs	10	N.A.	7		Internal Database	10	different transformers based embeddings, e.g. PubMedBIRT	MLOps pipeline (consisting of different modules, e.g. for training, transformation, inference, etc.)		human	feedback loop		data generated by medical coders
Bayer			2020-2022	Multilingual	Text translation, topic discovery	text embeddings, clustering	Cloud (AWS)	Production	Completed	Global detection of topics in medical inquiries	User feedback	Yes	insights generation, increased efficacy	9	200+	6		SaaS and internal Database	9
Bayer			2021-2022	Multilingual	Text translation, topic discovery, sentiment analysis, NER, topic classification	text embeddings, SaaS, zero-shot learning	Cloud (AWS)	Production	Completed	gain insights in MSL discussion notes	User feedback	Yes	insights generation, operational efficiency	9	200+	6		SaaS	9
Bayer			2022	English	Text extraction, NER, semantic search	text embeddings, question-answering, advanced APIs	Cloud (AWS)	Production	In Progress	insights generation for selected brands	User feedback	Yes	insights generation, operational efficiency	7		5		internal Databases
Bayer			2022	English	Text classification		Cloud (AWS)	Production	Completed	Automated classification of interactions with health authorities	User feedback	Yes	operational efficiency	8	100+	2		Manually annotated internal data		PubMedBERT			human			Documents of interactions with health authorities																	Build, is from internal data
Roche		Roman Saiz	2021-09-01	English	Key word extraction and Entity mapping	Pharma Complaints	GCP integrated to gChat	Production	Completed	Users searching and landing on the page (not document) of what they are looking for	User feedback	yes	Automating the complaint intake process	7	110+	3	NA	Condor, Phoenix	10	Keyword extractor	NA,	NA	Manual, user feedback	Optimize for medical language	NA	Pharma complaints intake documents	12 documents	Missing technical terminology	NA	structured	NA		NA	yes	yes	yes	yes	yes	yes	1 Business, 1 NLP Expert inhouse, Vendor AI expert team	high (Saved 1 FTE)	NA	buy
Boehringer Ingelheim	Identification of emerging trends in MSL discussion notes	Jens Barthelmes	2022	English, Japanese	Text classification, unsupervised topic modeling, NER	Indications, active ingredients, product classes, brands	on premise	production	in progress	Identification of emerging trends in MSL discussion notes	NPS score /customer survey	yes	Operational efficiency	8	400	10	N/A	Internal database	3	Topic detection: Lingo4G	Identify topic combinations, bin into weekly bins, apply Mann-Kendall test, compute slope (Theil-Sen regression), discretize into distinct trend categories	pymannkendall, sklearn	retrospectively	Works well as long as there are minimum 8 weeks of time series data with reasonable amount of topic (co-)occurrences; does not work for short term trend detection; does not work for low volume topics; tends to reveal what is already known.	Find an algorithm (non statistical) that works for low numbers	Internally source MSL discussion notes	1000s of notes	Complex and ambiguous wording in MSL discussion notes	Anonymization	manual	data itself was clean and high quality; the diversity of topics was high so that no significant trends could be identified	not sure if (semi-)manual tagging would help to get more abstraction; in the end it is about high enough volumes that are required for statistical trend identification in text data.	MeSH, RxNorm, custom synonyms	yes	yes	yes	yes	applicable to a broad range of other datasets without modification	maybe	Internal	Low (Medium effort / low benefit)	High	Build
Boehringer Ingelheim	MedInfo topic detection & trend	Jens Barthelmes	2022	English, Japanese	Text classification, unsupervised topic modeling, NER	Indications, active ingredients, product classes, brands	on premise	production	in progress	productive use in a set number of users	NPS score /customer survey	yes	Operational efficiency	8	10	10	N/A	Internal database	3	Topic detection: Lingo4G	Identify topic combinations, bin into weekly bins, apply Mann-Kendall test, compute slope (Theil-Sen regression), discretize into distinct trend categories	pymannkendall, sklearn	retrospectively	Works well as long as there are minimum 8 weeks of time series data with reasonable amount of topic (co-)occurrences; does not work for short term trend detection; does not work for low volume topics; tends to reveal what is already known.	Find an algorithm (non statistical) that works for low numbers	Internally sourced Medical enquiry transcripts		Multi-lingual, partially manually translated	Removal of pre-defined FAQs, separation of languages within the same document	manual	data quality was volatile due to different language skills in different countries; due to restrictions in the vendor system, the request text field was used to store additional information, creating more demand on data cleaning.	data should be captured in a more standardized way; the request text should not be used to store any other additional data.	MeSH, RxNorm, custom synonyms	yes	yes	yes	yes	applicable to a broad range of other datasets without modification	yes	Internal	Med (Medium effort / medium benefit)	High	Build
Boehringer Ingelheim	Voice of the customer for strategic communication	Jens Barthelmes	2021	English	Text classification, unsupervised topic modeling, NER	Voice of customer	on premise	MVP	in progress	message recall survey analysis	NPS score /customer survey	yes	understanding of authentic voice of the customer for strategic communication	6	15	10	N/A	External survey data	4	Topic detection: Lingo4G; Phi coefficient, Fisher z transformation	Select two dimensions, test for correlation, visualize correlations in heatmap	sklearn, pandas	retrospectively	Requires large data volumes; most correlations were not significant due to low number of co-occurrences; overall great potential to reveal hidden insights from a large dataset	Improve input to allow for better abstraction of the topics	Survey results	1000s of responses	none	none	manual	very brief text response from HCPs but low complexity and high level of standardization due to the intended reflection of the wording from the sales rep.	no change	MeSH, RxNorm, custom synonyms	N/A	yes	partially	yes	applicable to other sentiment analysis use cases	yes	Internal	Med (Medium effort / medium benefit)	High	Build
Boehringer Ingelheim	Listen to patients	Ben Collins	2019	English	Text classification, NER	Patient symptoms -	SaaS	PoC	completed	Voice of the patient, social media analytics	NPS score /customer survey	yes	patent centric clinical trial design	3	5	5	N/A	social media patient fora	4							Social media data from patient fora		Ethical, data privacy and compliance guidelines applied to retrieval and analysis of patient data						N/A	yes, identified insights about the authentic voice of the patient	partially	yes	applicable to other sentiment analysis use cases	yes	External	Med (Medium effort / medium benefit)	High	TBD
Boehringer Ingelheim	Similarity search	Jens Barthelmes	2022	20+	Similarity search	NLP-preprocessing, vectorization, similarity score	on premise	production	in progress	Similarity search on medical information enquiries	NPS score /customer survey	yes	Able to provide more comprehensive scientific responses to customers	7	400	10	N/A	Internal database	8	Apache Solr MLT	Auto-translation into English, then matching and ranking in English	MLT	manual evaluation of top 10 similar results for a set of 200 queries	Not perfect but works reasonably well to provide value	Try more advanced vectorizing techniques (embeddings)	Internally sourced Medical enquiry transcripts	>10000 enquiries	data sharing across regions only possible after anonymization	Removal of pre-defined FAQs, separation of languages within the same document, anonymization	manual	data quality was volatile due to different language skills in different countries; due to restrictions in the vendor system, the request text field was used to store additional information, creating more demand on data cleaning.	data should be captured in a more standardized way; the request text should not be used to store any other additional data.	none	yes	yes	yes	yes	applicable to a broad range of other datasets without modification	yes	Internal	High (Low effort /High benefit)	Medium	Build
Boehringer Ingelheim	Enhanced text searches across data sources	Jens Barthelmes	2020	English	Text classification, unsupervised topic modeling, NER	NLP models (for extraction for sentiment analysis, Questions and Answers service, disambiguation, conferencing)	cloud / AWS	PoC	in progress	Intent-based search on medical content	%accuracy	yes	Operational efficiency	7	10	5		Medical & scientific literature, synthesized medical content generated by Boehringer Ingelheim	2							Internally sourced data								In preparation	In progress	yes	yes	Broad use of enhanced search functionality across different sources	TBD	External	Med (Medium effort / medium benefit)	Medium	Buy
Astrazeneca	Named Entity Extraction and Linking		2022	English	NER solution for biomedical domain		on premise / AWS, k8s	Production	in progress	Bests in class NER system for biomedical domain	recall, precision, F1, AUC	YES	Benefit multiple stakeholders as an Enterprise offering	7		4		BERN2		BERN2 / Spacy / Python		python, scala													yes					internal
Astrazeneca	Relationship extraction for Knowledge Graph		2022	English	NER + linking, relationship extraction		on premise / Azure, databricks	Production	in progress	A primary source of Knowledge Graph for drug discovery purposes, relationships between entities (genes, drugs, etc) extracted from public literature (pubmed, etc)	Graph downstream tasks performance, graph metrics	YES	Knowledge Graph for drug discovery needs	8		4	20M+	pubmed		Python, scala, databricks, stanford nlp						external and internal free-text publications		consolidation of multiple sources							yes					internal

## Sheet: Fail_Old
Company	Project title/short description	Owner or POC	Start-end dates (year)	Language	NLP Type	NLP subtype	Deployment type	Project Level	Project Phase	Expected Endpoint	Success criteria	Success achieved	Higher Business Goals	Overall Maturity Rating	Customer size	FTEs involved	Training set / source	Primary Data Sources	Endpoint reached [1..10]	Algorithms used	Algorithm - workflows	Algorithm - library / version	Algorithm evaluation	Algorithm - learning	Algorithm - next time	Data - description	Data Size	Data-issues	Data-preparation	Data-evaluation	Data- learning	Data-next time	Taxonomies used	Was this a succcess for devs	Was this a success for business	Was there proper dev support	Was there proper bus support	Other applications of the technology?	Would the BO do it again	Project team	Value to effort ratio	Non-NLP approach effort	Build vs buy recommendation	Additional relevant information
Pistoia Alliance	Extraction of key execution parameters	Birthe Nielsen	2021	English	Named Entity Recognition			PoC	Ended	Ability to translate text or semi-structured methods to machine readable instructions	>	Not successful	Significant time and cost saving based upon automated data transfer and increased reproducibility			1		USP Monographs, CAS documents, Elsevier manuscripts	4	SpaCy		classic approach (not transformers)	human evaluation		Scoping needed	free text		Unsupervised and rule-based approaches quickly reach their limits			The irregularity of written text requires a powerful semi-supervised approach	Need clear definition of what should be extracted (Target Model)		no	no	no			No	external	high (5 value/1 effort)	Manual evaluation	Build	USP has made some progress on a few of their monographs, however PDF documents are not great source so they are using XML
Takeda			2021-present	Multilingual, starting with English	NLP models (for extraction, for sentiment analysis, Questions and Answers service, disambiguation, coreferencing)	NLP models (for extraction, for sentiment analysis, Questions and Answers service, disambiguation, coreferencing)	On Cloud (AWS or Azure)	PoC, MVP	In Progress	a selfserving chatbot to answer any questions for the employees, a wholly designed conversational AI framework, a NLP tool deployment for medical keywords extraction and ontology mapping	TBD	Not as relevant today	Better Employee Experience, Reduce Friction, Supporting Hybrid or Remote work strategy	5	~2k+ users expected	2		Internal company database
Boehringer Ingelheim	Identification of MSL insights	Jens Barthelmes	2022	English, Japanese	Text classification, unsupervised topic modeling, NER	Indications, active ingredients, product classes, brands	on premise	Production	In Progress	Identification of market and customer insights from MSL discussion notes	NPS score /customer survey	not yet	Operational efficiency	6	400	10	N/A	Internal database	3	Topic detection: Lingo4G	Sentence segmentation, then sentence wise classification	TFIDF vectorizer, Logistic Regression classifier	class probability threshold 75% -> precision 80%	Required specific target classes and training sets of approx. 500 interaction notes for each class; this effort can only be done for a few strategically important classes of sentences	Apply retrieval augmented generation to answer adhoc-questions	Internally sourced MSL discussion notes	1000s of notes	Complex sentences & language	Anonymization	manual	standardization at time of data creation would be helpful; splitting of notes into separate, targeted fields at time of data creation would be helpful	potentially simplify & harmonize language using LLMs prior to analysis?	MeSH, RxNorm, custom synonyms	Partially	No	yes	yes	applicable to a broad range of other datasets	no	Internal	Low (High effort / medium benefit)	High	Build
Boehringer Ingelheim	Extractive auto-summarization	Jens Barthelmes	2021	English	Extractive auto-summarization	auto-summary	on premise	production	in progress	Auto-text summaries of medical enquries and MSL discussion notes	%accuracy	no	Operational efficiency	3	400	10	N/A	Internal database	2	Extractive summarization	Vectorization (TFIDF), PCA, clustering, PageRank	spacy, sklearn	retrospectively	Worked well for rather standardized language (commercial interaction notes) but not sufficiently well for scientific language (MSL interaction notes). Abstractive summarization would have been favored by the users.	Leverage latest generation LLM abstractive summarization capabilities	Internally sourced data	typically pre-selection of 50-200 notes from a larger set of 1000s of notes	Low level and specific wording in scientific discussion notes, making it hard to summarise	Sentence segmentation, normalization by removal of country specific structuring elements (e.g. section tags).	manual	the more standardized the input, the better it can be summarized via statistical methods	would not change the data but rather the algorithms	none	No	no	yes	yes	applicable to a broad range of other datasets without modification	no	Internal	Med (High effort /high potential)	High	Build
Roche	Incident categorization	Roman Saiz	01/2020-02/2022	R	Topic modeling	Incident IDs and descrition of ServiceNow records	RStudio instance on laptop	MVP	completed	Prediction of the category of the incident to come. This is not embedded into the source because ServiceNow is an Out of the box solution, which would be the final put into production.	Manual review	yes	Enable the team to focus on relevant improvements and more value added activities.	5	All working inside the same service being analyzed	5	100/0, non-supervised. A lot of techniques to improve the results were put aside for future implementstions, such as the combination of supervised and non-supervised techniques, cross-validation, etc	Internal validated ticketing system		Latent Dirichlet Allocation algorithm	N/A	library(dplyr) library(tidyverse) library(tm) library(stringr) library(topicmodels) library(wordcloud) library(rmarkdown) library(dendextend) library(slam) library(factoextra) library(NbClust) library(stringi) library(cld2) library(textmineR) library(reshape) library(data.table)	manual vs automated	Manual intervention for number of topics and review of success	Don't know	Infrastructure ticketing data	6M	translate different languages	Filter by English tickets Remove SNow templates Remove punctuation and digits Remove emails and web pages Remove servers Dictionary of synonyms Remove stopwords Remove multiple spaces Remove names, surnames, Roche IDs Remove cities and countries Stemming	Human evaluation	The data should have granularity enough to focus on a specific service	Standardize language	No	yes	no	no	no	yes	Lack of marketing and sponsorship, so I don't know	2 NLP Experts, 1-3 Subject matter expert of the service	high (5 value/1 effort)	AWS- Amazon Comprehend & AWS Translate	build
Pfizer			2022	English	NER Entity linking			PoC	Completed	System for evaluating ambiguous mention	Increasing accuracy over existing pipeline		Reduce noise in the central literature searching	4	200+	5	Reduce noise in the central literature searching	Medline abstracts	5	BioBERT	custom pipeline	(not important)	manual evaluation	Require a significant amount hard to get training data		gene disease hits from pubmed		lack of high quality positive and negative examples	Using existing pipeline (i2e) training data	manual review			NCBI / uniProt gene dictionaries	no	no	yes	yes		yes	QuantiPHI	unknown	manual evaluation
Vertex			2022	English	Named Entity Recognition			PoC	in progress	build ontology and populate knowledge graph for sample and associated properties to enable data search, aggregation, and modeling (capture entities and events)	ingestion from disparate source systems, both structured and unstructured, with >85% success on unstructured ingestion and search		Ability to easily follow journey of a compound from virtual to candidate. Also associate decisons and campaigns	2	200	3		Home built sample management applications and report repositories	1	BioBERT (for unstructured assay data)			human			Both structured relational DB sources and unstructured documents as well as external (ChEMBL)		data tables containing text/numbers	extract and human cross checks	human with test queries		Rebuild and also create decision capture tool (knowledge platform) to better provide context on sample data	many commercial / open source plus extensive internal developed ont	yes	no	no	yes		yes	internal (will bring in EPAM for next build)	med (2 value/1 effort)
Roche		Roman Saiz			Concept extractionSemantic search Taxonomy mapping			MVP	in progress	Build an expert finding tool that extracts expertise and builds profiles automatically based on document authorship and that allows semantic search for experts	recall and precision		connect people to people (saving time, fostering collaboration)	6	18000	4		internal document management systems (e.g. Condor, RDR, IDM, SharePoint) as well as external document sources (e.g. Pubmed)	5	TextRank, word2vec, BERT	custom pipeline	always latest	manually curated test set, human evaluation (Precision + Recall)		same algorithms, different setup (use TextRank for summarization, not key concept extraction)	Roche internal documents		domain specific language, difficult authorship detection across systems	simple method for meaningful text extraction from pdf	using descriptive statistics and BERT embeddings visualization	data cleaning upfront (e.g. by adding a waterfall-style cleaning gate before going into agile development of the solution)	automatic authorship detection, start from one source system and expand systematically	ESCO, custom skills taxonomy	no	no	yes	no		yes	KM (business), RGITSC (IT)	med (2 value/1 effort)	It is possible to build an expert finder without NLP (build an index from the document corpus and do regular lookups through the index instead of semantic search and vectorization). The effort needed is very low, but the provided results are not satisfying.	build

## Sheet: An_Old
Project title/short description	Success achieved	Overall Maturity Rating	FTEs involved	Endpoint reached [1..10]	Taxonomies used	Was there proper dev support	Was there proper bus support	Value to effort ratio
Interactive Text Mining Suite (ITMS)	1	8	1		0	0	0	4					Success		Failure		T-test at a=0.05
Preclinical toxicology report mining with HAWK	1	9	2		0	1	1	1.5					Mean	Std Dev	Mean	Std Dev
Finding criticality misclassification	1	7	4		0	1	1	2				Maturity	7.63158	1.49854	4.42857	1.51186	not sign
Merck KGaA 5	1	8	5	8	0	1	1					FTEs	5.57895	2.83462	5	3.38062
Merck KGaA 6	1	9	7	8	0	1	1					Endpoint	6.5	3.03015	3.33333	1.63299	not sign
Bayer 7	1	10	7	10								Taxonomies	0.3	0.483046	0.666667	0.516398		categorical
Bayer 8	1	9	6	9								Dev supp	0.833333	0.325669	0.571429	0.534522		categorical
Bayer 9	1	9	6	9								Biz supp	0.916667	0.288675	0.666667	0.516398		categorical
Bayer 10	1	7	5									Ratio	2.25	1.2304	2.75	1.78185
Bayer 11	1	8	2
Roche 12	1	7	3	10	0	1	1	4
Identification of emerging trends in MSL discussion notes	1	8	10	3	1	1	1	1
MedInfo topic detection & trend	1	8	10	3	1	1	1	1.5				Descriptive fields (no expectation to have any effect on success)							Too variable to formulate a hypothesis
Voice of the customer for strategic communication	1	6	10	4	1	0.5	1	1.5				Company							NLP Type
Listen to patients	1	3	5	4		0.5	1	1.5				Project title/short description							NLP subtype
Similarity search	1	7	10	8	0	1	1	4				Owner or POC							Deployment type
Enhanced text searches across data sources	1	7	5	2		1	1	1.5				Start-end dates (year)							Expected Endpoint
Named Entity Extraction and Linking	1	7	4																Success Criteria
Relationship extraction for Knowledge Graph	1	8	4									No correlation with success flags							Higher Business Goals
Extraction of key execution parameters	0		1	4		0		5				Project Level							Training set / source
Takeda 22	0	5	2									Project Phase							Primary Data Sources
Identification of MSL insights	0	6	10	3	1	1	1	1				Language							Algorithms used
Extractive auto-summarization	0	3	10	2	0	1	1	1.5				Data Size							Algorithm - workflows
Incident categorization	0	5	5		0	0	0	5				Customer size							Algorithm - library / version
Pfizer 25	0	4	5	5	1	1	1					Benefit to expense ratio							Algorithm evaluation
Vertex 26	0	2	3	1	1	0	1	2											Algorithm - learning
Roche 27	0	6	4	5	1	1	0	2				No expectation to have an effect on biz success							Algorithm - next time
												Was this a succcess for devs							Data - description
												Other applications of the technology?							Data-issues
												Would the BO do it again							Data-preparation
												Build vs buy recommendation							Data-evaluation
																			Data- learning
												New (empty) field							Data-next time
												Is this an LLM use case?							Project team
																			Non-NLP approach effort
																			Additional relevant information
