# Supplementary material
Source: Research Square preprint supplement (doi:10.21203/rs.3.rs-9871864/v1)
Supplement: Supplementary file 2 [file 493dd944dfcce9022955736d.xlsx]

## Sheet: New harmonized categories
project_title
company
old_title
project_description
POC
start_end_dates
language
deployment_type
success_for_devs
success_for_business
proper_dev_support
proper_bus_support
other_applications_of_technology
bo_do_again
build_vs_buy_recommendation
programming_language
deployment_location
deployment_details
project_level
project_phase
project_team_and_ftes
algorithms_used
endpoint_reached_percentage
data_source_category
data_source_description
success_criteria_category
success_criteria_additional_info
algorithm_workflows
algorithm_library_version
algorithm_evaluation
algorithm_next_time
standardized_nlp_type
standardized_nlp_subtype
expected_endpoint
higher_business_goals
success_achieved
data_next_time
data_learning
data_evaluation
data_preparation
data_issues
data_description
maturity_rating
customer_size
training_set_source
taxonomies_used
summary
additional_info
